# Supplementary material for: A Lupinus angustifolius protein hydrolysate exerts hypocholesterolemic effects in Western diet-fed ApoE−/− mice through the modulation of LDLR and PCSK9 pathways
Source: Royal Society of Chemistry journal article supplement (doi:10.1039/d1fo03847h), 2022-01-01
Supplement: d1fo03847h1.pdf [file d1fo03847h1.pdf]

## Supplementary materials

### **A *Lupinus angustifolius* protein hydrolysate exerts hypocholesterolemic effect in western diet-fed-ApoE<sup>-/-</sup> mice through the modulation of LDLR and PCSK9 pathways**

Guillermo Santos-Sánchez,<sup>a,b,†</sup> Ivan Cruz-Chamorro<sup>a,b,†</sup>, Carlotta Bollati<sup>a</sup>, Martina Bartolomei<sup>a</sup>, Justo Pedroche<sup>c</sup>, Francisco Millán<sup>c</sup>, María del Carmen Millán-Linares<sup>d</sup>, Anna Laura Capriotti<sup>e</sup>, Andrea Cerrato<sup>e</sup>, Aldo Laganà<sup>e</sup>, Anna Arnoldi<sup>a</sup>, Antonio Carrillo-Vico<sup>b,\*</sup>, Carmen Lammi<sup>a,\*</sup>

#### **Reagents**

Dulbecco's modified Eagle's medium (DMEM), L-glutamine, fetal bovine serum (FBS), phosphate buffered saline (PBS), penicillin/streptomycin, chemiluminescent reagent, and 24 or 96-well plates were purchased from Euroclone (Milan, Italy). Bovine serum albumin (BSA), RIPA buffer, pravastatin, the antibody against  $\beta$ -actin, and HMGCoAR assay kit were bought from Sigma-Aldrich (St. Louis, MO, USA). The antibody against HMGCoAR was bought from Abcam (Cambridge, UK). The antibody against phospho-HMGCoAR (Ser872) was purchased from Bioss Antibodies (Woburn, MA, USA). Phenylmethanesulfonyl fluoride (PMSF), Na-orthovanadate inhibitors, and the antibodies against rabbit Ig-horseradish peroxidase (HRP), mouse Ig-HRP, and SREBP-2 were purchased from Santa Cruz Biotechnology Inc. (Santa Cruz, CA, USA). The antibodies against the LDLR and the phospho-5' AMP-activated protein kinase (AMPK) (Thr172) were bought from Pierce (Rockford, IL, USA). The antibodies against hepatocyte nuclear factor 1-alpha (HNF1- $\alpha$ ) and PCSK9 were bought from GeneTex (Irvine, CA, USA). The inhibitor cocktail Complete Midi from Roche (Basel, Swiss). Mini protean TGX pre-cast gel 7.5%, and Mini nitrocellulose Transfer Packs were purchased from BioRad (Hercules, CA, USA).

#### **Lipid profile quantification**

TC, HDL, LDL and TG levels were quantified in plasma through chemiluminescence immunoassay techniques using the COBAS E 601<sup>®</sup> modular analyzer (Roche Diagnostic, Basel, Switzerland). Liver was homogenized in chloroform:isopropanol:Nonidet P-40 (Sigma Aldrich) (7:11:0.1 v/v/v). Samples were centrifuged at 10,000 $\times$  g for 10 min at 4 °C and the supernatant was collected and dried in a Jouan RC1022 evaporator (Thermo Fisher Scientific, Vantaa, Finland). The pellet obtained was dissolved in saline 1% Nonidet P-40. Hepatic total cholesterol (hTC) and hepatic triglycerides (hTG) levels were measured through a chemiluminescence immunoassay using the COBAS E 601<sup>®</sup> modular analyser (Roche Diagnostics).

**Table S1.** Composition of standard diet

| <b>Ingredients</b>                | <b>%</b>    |
|-----------------------------------|-------------|
| <b>Fat <sup>1</sup></b>           | <b>4.0</b>  |
| Palmitic (C16:0)                  | 0.5         |
| Stearic (C18:0)                   | 0.1         |
| Oleic (C18:1 $\omega$ 9)          | 0.7         |
| Linoleic (C18:2 $\omega$ 6)       | 2.0         |
| Linolenic (C18:3 $\omega$ 3)      | 0.1         |
| Total saturated FFAA              | 0.6         |
| Total monounsaturated FFAA        | 0.7         |
| Total polyunsaturated FFAA        | 2.1         |
| <b>Carbohydrate</b>               | <b>48.0</b> |
| <b>Protein</b>                    | <b>14.3</b> |
| <b>Cholesterol (mg/kg)</b>        | --          |
| <b>Total energy (2.90 kcal/g)</b> |             |
| Fat (ether extract)               | 13          |
| Carbohydrates                     | 67          |
| Protein                           | 20          |

Macronutrients percentage of the standard diet and energy provided from the different macromolecules. The complete product description is available in <sup>1</sup>. FFAA, fatty acids.

<sup>1</sup>The fat of this diet proceeds from soybean oil.

**Table S2.** Composition of experimental Western diet

| <b>Ingredients</b>                      | <b>%</b> |
|-----------------------------------------|----------|
| <b>Fat (2.12 kcal/g)</b>                |          |
| Lard                                    | 20.68    |
| Soybean oil                             | 2.91     |
| <b>Carbohydrate (1.65 kcal/g)</b>       |          |
| Sucrose                                 | 20.09    |
| Maltodextrin                            | 11.65    |
| Dextrin                                 | 8.48     |
| Powdered cellulose                      | 5.82     |
| <b>Protein (0.83 kcal/g)</b>            |          |
| Casein - vitamin tested                 | 23.30    |
| <b>Vitamin Mix</b>                      | 1.16     |
| <b>Mineral Mix</b>                      | 1.16     |
| <b>Food additives</b>                   |          |
| Potassium citrate. Tribasic monohydrate | 1.92     |
| Calcium phosphate                       | 1.51     |
| Calcium carbonate                       | 0.64     |
| L-Cystine                               | 0.35     |
| Choline bitartrate                      | 0.23     |
| Food colouring (FD&C Red No.40)         | 0.05     |
| <b>Total energy (4.60 kcal/g)</b>       |          |
| Fat (ether extract)                     | 46.1     |
| Carbohydrates                           | 35.8     |
| Protein                                 | 18.1     |

Ingredients percentage of the high-fat Western diet and energy provided from the different macromolecules.

**Figure S1.**  $\beta$ -actin levels concentration among the groups

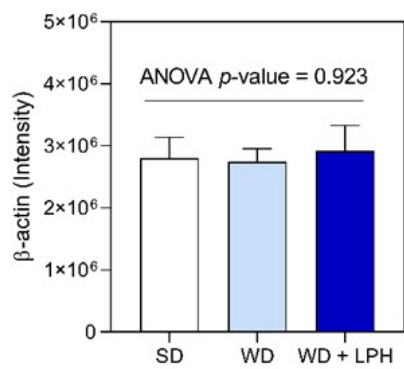

## Notes and references

1. ENVIGO, Teklad Global 14% Protein Rodent Maintenance Diet, <https://insights.envigo.com/hubfs/resources/data-sheets/2014s-datashet-0915.pdf>, (accessed Feb 2022).
