# Supplementary material for: A Lupinus angustifolius protein hydrolysate exerts hypocholesterolemic effects in Western diet-fed ApoE−/− mice through the modulation of LDLR and PCSK9 pathways
Source: Royal Society of Chemistry journal article supplement (doi:10.1039/d1fo03847h), 2022-01-01
Supplement: d1fo03847h2.xlsx [file d1fo03847h2.xlsx]

## Sheet: protein IDs
Accession	Description	ΣCoverage	Σ# Proteins	Σ# Unique Peptides	Σ# Peptides	Σ# PSMs	Score A2	Coverage A2	# Peptides A2	# PSM A2	Score B2	Coverage B2	# Peptides B2	# PSM B2	Score C2	Coverage C2	# Peptides C2	# PSM C2	# AAs	MW [kDa]	calc. pI
F5B8V7	Conglutin alpha 2 OS=Lupinus angustifolius OX=3871 GN=TanjilG_32393 PE=1 SV=1 - [CONA2_LUPAN]	32.66	1	40	43	237	3057.54	27.53	29	79	3045.55	27.06	29	80	2754.41	19.6	26	78	643	74.1496	5.14795
B8Q5G0	Conglutin beta OS=Lupinus angustifolius OX=3871 PE=2 SV=1 - [B8Q5G0_LUPAN]	28.97	2	25	35	263	3259.84	28.48	26	86	3544.25	27	27	94	2979.19	28.31	29	83	611	71.8531	6.11279
F5B8V6	Conglutin alpha 1 OS=Lupinus angustifolius OX=3871 GN=CONALPHA PE=1 SV=1 - [CONA1_LUPAN]	27.27	1	34	34	159	1435.15	25.3	25	51	1684.88	21.54	25	53	1636.64	24.9	27	55	506	57.7578	5.37646
A0A1J7G5F6	Cupin type-1 domain-containing protein OS=Lupinus angustifolius OX=3871 GN=TanjilG_19230 PE=4 SV=1 - [A0A1J7G5F6_LUPAN]	27.11	3	6	19	127	1799.55	25.07	15	43	1871.04	23.62	14	43	1739.46	21.57	14	41	343	39.1085	4.98291
A0A1J7IM68	ADH_N_2 domain-containing protein OS=Lupinus angustifolius OX=3871 GN=TanjilG_26738 PE=4 SV=1 - [A0A1J7IM68_LUPAN]	23.64	2	1	1	2	62.08	23.64	1	1	71.6	23.64	1	1					55	6.32222	6.55127
F5B8W3	Conglutin beta 5 OS=Lupinus angustifolius OX=3871 GN=BETA5 PE=1 SV=1 - [CONB5_LUPAN]	23.55	2	15	26	142	1694.41	21.51	19	42	2113.34	17.27	18	50	2219.91	19.31	19	50	637	75.1627	5.98584
A0A4P1R4M4	Peroxiredoxin OS=Lupinus angustifolius OX=3871 GN=TanjilG_09648 PE=3 SV=1 - [A0A4P1R4M4_LUPAN]	20.18	1	3	3	16	166.747	14.22	2	4	212.979	20.18	3	5	294.801	20.18	3	7	218	24.4586	6.93213
F5B8V8	Conglutin alpha 3 OS=Lupinus angustifolius OX=3871 GN=TanjilG_01206 PE=1 SV=1 - [CONA3_LUPAN]	20.17	1	11	14	56	568.139	17.09	8	16	574.989	13.68	7	15	813.49	17.09	12	25	585	67.3405	5.40186
B0YJF7	Conglutin beta (Fragment) OS=Lupinus angustifolius OX=3871 PE=2 SV=1 - [B0YJF7_LUPAN]	19.77	3	5	17	59	837.816	11.32	10	18	904.951	17.47	12	19	966.704	19.39	15	22	521	61.4326	5.40186
F5B8W1	Conglutin beta 3 OS=Lupinus angustifolius OX=3871 GN=BETA3 PE=1 SV=1 - [CONB3_LUPAN]	17.93	1	1	21	101	1223.63	13.28	15	30	1434.14	15.86	16	35	1514.22	17.24	17	36	580	68.1391	5.94775
A0A1J7G4N6	Glyoxalase I OS=Lupinus angustifolius OX=3871 GN=TanjilG_23749 PE=3 SV=1 - [A0A1J7G4N6_LUPAN]	16.01	1	8	8	27	359.701	16.01	4	8	471.565	15.66	6	10	392.823	16.01	6	9	281	31.5923	5.13525
F5B8W2	Conglutin beta 4 OS=Lupinus angustifolius OX=3871 GN=BETA4 PE=1 SV=1 - [CONB4_LUPAN]	15.25	1	4	19	81	1201.53	10.68	13	26	1278.65	13.22	14	27	1260.45	14.58	15	28	590	69.3658	6.29053
A0A1J7HWZ3	Uncharacterized protein OS=Lupinus angustifolius OX=3871 GN=TanjilG_18626 PE=4 SV=1 - [A0A1J7HWZ3_LUPAN]	13.69	1	2	2	8	136.189	13.69	2	3	162.421	13.69	2	3	105.714	13.69	2	2	168	18.7425	5.23682
A0A4P1R9Q2	Peptidyl-prolyl cis-trans isomerase OS=Lupinus angustifolius OX=3871 GN=TanjilG_23401 PE=3 SV=1 - [A0A4P1R9Q2_LUPAN]	13.37	1	3	3	9	116.939	13.37	3	3	116.277	13.37	3	3	119.436	13.37	3	3	172	18.146	8.45557
A0A4P1QWQ4	SHSP domain-containing protein OS=Lupinus angustifolius OX=3871 GN=TanjilG_09847 PE=3 SV=1 - [A0A4P1QWQ4_LUPAN]	13	1	5	5	19	167.558	12.5	3	5	323.909	13	4	9	186.224	13	5	5	200	22.6652	6.55127
A0A394D990	Uncharacterized protein OS=Lupinus angustifolius OX=3871 GN=TanjilG_30889 PE=4 SV=1 - [A0A394D990_LUPAN]	12.93	1	1	1	1		0				0			35.35	12.93	1	1	147	16.4983	4.91943
A0A1J7GA13	Histone H4 OS=Lupinus angustifolius OX=3871 GN=TanjilG_02368 PE=3 SV=1 - [A0A1J7GA13_LUPAN]	10.68	2	1	1	2	47.83	10.68	1	1	44.2	10.68	1	1		0			103	11.4024	11.4731
A0A1J7HGK1	Uncharacterized protein OS=Lupinus angustifolius OX=3871 GN=TanjilG_12794 PE=4 SV=1 - [A0A1J7HGK1_LUPAN]	10.12	1	2	2	5	91.2448	10.12	1	2	57.57	10.12	1	1	80.2744	10.12	2	2	168	18.5134	5.10986
A0A4P1R144	Histone H2A OS=Lupinus angustifolius OX=3871 GN=TanjilG_17187 PE=3 SV=1 - [A0A4P1R144_LUPAN]	9.15	2	1	1	3	46.08	9.15	1	1	51.05	9.15	1	1	47.17	9.15	1	1	153	16.1992	10.8433
F5B8X0	Conglutin delta 3 OS=Lupinus angustifolius OX=3871 PE=2 SV=2 - [COND3_LUPAN]	8.72	2	1	1	1		0				0			49.53	8.72	1	1	149	17.3957	6.1001
A0A4P1RE09	Lipoxygenase OS=Lupinus angustifolius OX=3871 GN=TanjilG_05964 PE=3 SV=1 - [A0A4P1RE09_LUPAN]	8.69	2	12	13	32	456.159	7.3	8	12	480.806	7.18	9	13	259.46	6.26	6	7	863	97.2818	6.13818
A0A1J7HK98	Uncharacterized protein OS=Lupinus angustifolius OX=3871 GN=TanjilG_00355 PE=3 SV=1 - [A0A1J7HK98_LUPAN]	8.57	3	1	1	2	71.93	8.57	1	1		0			42.54	8.57	1	1	140	14.9871	10.4771
A0A4P1RIP9	Uncharacterized protein OS=Lupinus angustifolius OX=3871 GN=TanjilG_28374 PE=4 SV=1 - [A0A4P1RIP9_LUPAN]	8.57	1	4	4	12	152.296	6.12	2	3	229.441	8.57	3	5	137.282	6.12	3	4	490	56.1233	6.49365
A0A4P1QV48	SHSP domain-containing protein OS=Lupinus angustifolius OX=3871 GN=TanjilG_23824 PE=3 SV=1 - [A0A4P1QV48_LUPAN]	7.64	2	1	1	2	83.8548	7.64	1	2		0				0			157	17.7293	6.82959
A0A1J7HUX7	Annexin OS=Lupinus angustifolius OX=3871 GN=TanjilG_02799 PE=3 SV=1 - [A0A1J7HUX7_LUPAN]	7.28	1	3	3	19	174.868	3.48	1	5	271.506	7.28	2	7	235.827	3.48	2	7	316	35.8197	5.73193
A0A4P1RSN4	Peptidase A1 domain-containing protein OS=Lupinus angustifolius OX=3871 GN=TanjilG_22621 PE=3 SV=1 - [A0A4P1RSN4_LUPAN]	6.67	2	2	2	10	145.359	3.47	1	3	162.434	3.47	1	3	171.602	6.67	2	4	375	41.0241	6.7124
A0A1J7FW36	Phosphopyruvate hydratase OS=Lupinus angustifolius OX=3871 GN=TanjilG_30891 PE=3 SV=1 - [A0A1J7FW36_LUPAN]	6.56	5	2	2	3	39.42	3.28	1	1	43.79	3.28	1	1	41.69	3.28	1	1	427	45.8946	5.22412
A0A4P1QYM6	Uncharacterized protein OS=Lupinus angustifolius OX=3871 GN=TanjilG_12301 PE=3 SV=1 - [A0A4P1QYM6_LUPAN]	6.37	1	1	1	1	51.06	6.37	1	1		0							251	24.667	8.85107
A0A1J7HUZ4	Uncharacterized protein OS=Lupinus angustifolius OX=3871 GN=TanjilG_01875 PE=3 SV=1 - [A0A1J7HUZ4_LUPAN]	6.32	1	5	5	26	244.127	6.05	3	8	290.251	6.32	5	10	237.987	6.32	4	8	380	41.2699	6.94678
A0A1J7HAK7	1,2-dihydroxy-3-keto-5-methylthiopentene dioxygenase OS=Lupinus angustifolius OX=3871 GN=TanjilG_20518 PE=3 SV=1 - [A0A1J7HAK7_LUPAN]	6.01	1	1	1	1		0			45.3	6.01	1	1					183	21.4636	5.36377
A0A1J7HK42	EF1_GNE domain-containing protein OS=Lupinus angustifolius OX=3871 GN=TanjilG_14172 PE=3 SV=1 - [A0A1J7HK42_LUPAN]	5.83	3	1	1	1		0				0			50.26	5.83	1	1	223	24.3093	4.69092
A0A4P1R0V6	Uncharacterized protein OS=Lupinus angustifolius OX=3871 GN=TanjilG_32288 PE=4 SV=1 - [A0A4P1R0V6_LUPAN]	5.83	1	1	1	1						0			36.99	5.83	1	1	223	25.6833	5.75732
A0A1J7HTK9	Uncharacterized protein OS=Lupinus angustifolius OX=3871 GN=TanjilG_18677 PE=4 SV=1 - [A0A1J7HTK9_LUPAN]	5.48	1	1	1	2	82.8496	5.48	1	2		0				0			219	25.3201	5.51611
A0A4P1RVL2	Nucleoside diphosphate kinase OS=Lupinus angustifolius OX=3871 GN=TanjilG_25269 PE=3 SV=1 - [A0A4P1RVL2_LUPAN]	5.37	1	1	1	1		0				0			46.18	5.37	1	1	149	16.3996	6.80029
A0A4P1QZY1	Uncharacterized protein OS=Lupinus angustifolius OX=3871 GN=TanjilG_16799 PE=3 SV=1 - [A0A4P1QZY1_LUPAN]	5.35	1	1	1	1						0			46.08	5.35	1	1	243	27.5875	6.41748
A0A1J7IAA6	Uncharacterized protein OS=Lupinus angustifolius OX=3871 GN=TanjilG_27357 PE=4 SV=1 - [A0A1J7IAA6_LUPAN]	5.16	1	2	2	6	90.4096	5.16	2	2	90.4234	5.16	2	2	85.3872	5.16	2	2	639	67.1666	5.46533
A0A1J7IB35	Thioredoxin-dependent peroxiredoxin OS=Lupinus angustifolius OX=3871 GN=TanjilG_31109 PE=4 SV=1 - [A0A1J7IB35_LUPAN]	4.69	3	1	1	3	73.77	4.69	1	1	51.5	4.69	1	1	48.06	4.69	1	1	256	28.3326	5.69385
A0A4P1RMG0	PKS_ER domain-containing protein OS=Lupinus angustifolius OX=3871 GN=TanjilG_08010 PE=4 SV=1 - [A0A4P1RMG0_LUPAN]	4.62	1	1	1	2		0			79.69	4.62	1	1	59.53	4.62	1	1	325	34.6971	6.78564
A0A4P1R354	Uncharacterized protein OS=Lupinus angustifolius OX=3871 GN=TanjilG_27505 PE=3 SV=1 - [A0A4P1R354_LUPAN]	4.29	1	1	1	2		0			53.29	4.29	1	1	46.27	4.29	1	1	350	38.9704	8.11865
A0A4P1R8F7	Uncharacterized protein OS=Lupinus angustifolius OX=3871 GN=TanjilG_08620 PE=4 SV=1 - [A0A4P1R8F7_LUPAN]	4.29	1	1	1	2		0			32.87	4.29	1	1	30.96	4.29	1	1	443	48.0362	6.80029
A0A394D9J7	Glutamine synthetase OS=Lupinus angustifolius OX=3871 GN=TanjilG_02132 PE=3 SV=1 - [A0A394D9J7_LUPAN]	4.2	1	1	1	1	74.95	4.2	1	1		0				0			357	39.4991	6.65381
A0A4P1R809	Uncharacterized protein OS=Lupinus angustifolius OX=3871 GN=TanjilG_00827 PE=4 SV=1 - [A0A4P1R809_LUPAN]	4.03	1	1	1	3	80.42	4.03	1	2	61.56	4.03	1	1					273	31.053	5.68115
A0A1J7I030	Annexin OS=Lupinus angustifolius OX=3871 GN=TanjilG_21069 PE=3 SV=1 - [A0A1J7I030_LUPAN]	3.88	1	1	1	3	51.96	3.88	1	1	55.86	3.88	1	1	65.27	3.88	1	1	309	35.3103	6.04932
A0A1J7HWX4	Ubiquitin receptor RAD23 OS=Lupinus angustifolius OX=3871 GN=TanjilG_18317 PE=3 SV=1 - [A0A1J7HWX4_LUPAN]	3.77	2	1	1	3	60.91	3.77	1	1	61.33	3.77	1	1	41.13	3.77	1	1	398	42.1544	4.90674
Q42369	Gamma conglutin 1 OS=Lupinus angustifolius OX=3871 GN=LOC109345795 PE=1 SV=1 - [CONG1_LUPAN]	3.56	1	2	2	14	209.323	3.56	2	5	245.474	3.56	2	6	105.329	3.56	2	3	449	48.8854	7.72314
A0A4P1QZ06	Aldehyde dehydrogenase OS=Lupinus angustifolius OX=3871 GN=TanjilG_12702 PE=3 SV=1 - [A0A4P1QZ06_LUPAN]	3.48	1	1	1	2	61.73	3.48	1	1	69.19	3.48	1	1		0			488	53.2252	7.09326
A0A4P1RQK2	Lipoxygenase OS=Lupinus angustifolius OX=3871 GN=TanjilG_04445 PE=3 SV=1 - [A0A4P1RQK2_LUPAN]	3.37	3	2	3	5	67.389	1.98	2	3	66.1646	2.33	2	2		0			860	97.2046	6.21436
A0A4P1QP27	Uncharacterized protein OS=Lupinus angustifolius OX=3871 GN=TanjilG_08925 PE=4 SV=1 - [A0A4P1QP27_LUPAN]	3.12	1	1	1	3	40.54	3.12	1	1	38.32	3.12	1	1	34.83	3.12	1	1	417	47.0976	6.46826
A0A4P1QS49	Uncharacterized protein OS=Lupinus angustifolius OX=3871 GN=TanjilG_04853 PE=4 SV=1 - [A0A4P1QS49_LUPAN]	2.82	3	1	1	1		0			45.93	2.82	1	1		0			1065	117.342	5.18604
A0A1J7HFV8	Phosphoglycerate kinase OS=Lupinus angustifolius OX=3871 GN=TanjilG_12207 PE=3 SV=1 - [A0A1J7HFV8_LUPAN]	2.74	3	1	1	2	42.58	2.74	1	1	39	2.74	1	1		0			401	42.3827	5.84619
A0A1J7FVK4	S-(hydroxymethyl)glutathione dehydrogenase OS=Lupinus angustifolius OX=3871 GN=TanjilG_27256 PE=3 SV=1 - [A0A1J7FVK4_LUPAN]	2.63	1	1	1	1									42.2	2.63	1	1	380	40.5476	6.44287
A0A1J7H0Z2	UDP-arabinopyranose mutase OS=Lupinus angustifolius OX=3871 GN=TanjilG_29964 PE=3 SV=1 - [A0A1J7H0Z2_LUPAN]	2.52	5	1	1	5	94.2059	2.52	1	3	85.5352	2.52	1	2					357	40.4533	5.94775
A0A394D859	Uncharacterized protein OS=Lupinus angustifolius OX=3871 GN=TanjilG_27205 PE=3 SV=1 - [A0A394D859_LUPAN]	2.51	1	1	1	4	75.9496	2.51	1	2	45.95	2.51	1	1	43.34	2.51	1	1	517	55.9057	5.84619
A0A1J7FNK7	Uncharacterized protein OS=Lupinus angustifolius OX=3871 GN=TanjilG_20560 PE=3 SV=1 - [A0A1J7FNK7_LUPAN]	2.39	15	1	1	2	51.35	2.39	1	1	54.68	2.39	1	1		0			377	41.7969	5.49072
A0A394DF71	Fe2OG dioxygenase domain-containing protein OS=Lupinus angustifolius OX=3871 GN=TanjilG_06364 PE=3 SV=1 - [A0A394DF71_LUPAN]	2.34	1	1	1	1	43.41	2.34	1	1									384	43.6148	6.06201
A0A4P1RMC5	Uncharacterized protein OS=Lupinus angustifolius OX=3871 GN=TanjilG_21267 PE=3 SV=1 - [A0A4P1RMC5_LUPAN]	2.33	1	1	1	1						0			46.27	2.33	1	1	387	41.1967	5.73193
A0A4P1QYJ0	Uncharacterized protein OS=Lupinus angustifolius OX=3871 GN=TanjilG_12541 PE=4 SV=1 - [A0A4P1QYJ0_LUPAN]	2.27	1	1	1	3		0			48.73	2.27	1	1	73.1244	2.27	1	2	397	45.3302	8.30908
A0A1J7IPK2	V-ATPase 69 kDa subunit (Fragment) OS=Lupinus angustifolius OX=3871 GN=TanjilG_02418 PE=3 SV=1 - [A0A1J7IPK2_LUPAN]	2.08	3	1	1	2	62.15	2.08	1	1	61.11	2.08	1	1					530	57.8585	5.31299
A0A1J7HFP8	Phosphoglycerate kinase OS=Lupinus angustifolius OX=3871 GN=TanjilG_12206 PE=3 SV=1 - [A0A1J7HFP8_LUPAN]	2.07	1	1	1	3	57.36	2.07	1	1	54.6	2.07	1	1	53.77	2.07	1	1	484	50.5674	8.73389
A0A1J7HBL1	Phosphoenolpyruvate carboxylase OS=Lupinus angustifolius OX=3871 GN=TanjilG_22696 PE=3 SV=1 - [A0A1J7HBL1_LUPAN]	1.86	3	1	1	1					45.57	1.86	1	1		0			967	110.691	6.07471
A0A4P1RP06	Uncharacterized protein OS=Lupinus angustifolius OX=3871 GN=TanjilG_33023 PE=3 SV=1 - [A0A4P1RP06_LUPAN]	1.75	1	1	1	1	48.51	1.75	1	1									457	50.4914	6.39209
A0A4P1RA46	Poly [ADP-ribose] polymerase OS=Lupinus angustifolius OX=3871 GN=TanjilG_23651 PE=4 SV=1 - [A0A4P1RA46_LUPAN]	1.75	1	1	1	3	68.24	1.75	1	1	54.41	1.75	1	1	42.68	1.75	1	1	801	90.396	5.17334
A0A4P1QRT1	Methylmalonate-semialdehyde dehydrogenase (CoA acylating) OS=Lupinus angustifolius OX=3871 GN=TanjilG_20801 PE=3 SV=1 - [A0A4P1QRT1_LUPAN]	1.72	2	1	1	4	81.3992	1.72	1	3					37.42	1.72	1	1	524	56.1064	6.31592
A0A4P1RB37	Uncharacterized protein OS=Lupinus angustifolius OX=3871 GN=TanjilG_04094 PE=4 SV=1 - [A0A4P1RB37_LUPAN]	1.49	7	1	1	5	81.9696	1.49	1	2	107.65	1.49	1	3		0			807	89.5574	5.16064
A0A4P1RRI4	HATPase_c domain-containing protein OS=Lupinus angustifolius OX=3871 GN=TanjilG_19144 PE=3 SV=1 - [A0A4P1RRI4_LUPAN]	1.4	7	2	2	4	63.11	1.4	1	1	83.9668	1.4	2	2	43.29	1.4	1	1	783	89.1021	5.43994
A0A1J7I151	Alpha-1,4 glucan phosphorylase OS=Lupinus angustifolius OX=3871 GN=TanjilG_32470 PE=3 SV=1 - [A0A1J7I151_LUPAN]	1.34	1	1	1	1		0			42.59	1.34	1	1					972	109.719	5.52881
A0A1J7HYZ3	Uncharacterized protein OS=Lupinus angustifolius OX=3871 GN=TanjilG_19369 PE=4 SV=1 - [A0A1J7HYZ3_LUPAN]	1.03	2	1	1	2	29.65	1.03	1	1		0			25.09	1.03	1	1	681	77.0451	4.88135
A0A1J7HE31	AAA domain-containing protein OS=Lupinus angustifolius OX=3871 GN=TanjilG_22910 PE=4 SV=1 - [A0A1J7HE31_LUPAN]	0.96	2	1	1	1					38.13	0.96	1	1					834	93.3207	6.66846
A0A4P1R959	Uncharacterized protein OS=Lupinus angustifolius OX=3871 GN=TanjilG_23318 PE=3 SV=1 - [A0A4P1R959_LUPAN]	0.82	2	1	1	2		0				0			37.6356	0.82	1	2	1706	194.452	9.12939
A0A4P1QP48	Protein kinase domain-containing protein OS=Lupinus angustifolius OX=3871 GN=TanjilG_08930 PE=3 SV=1 - [A0A4P1QP48_LUPAN]	0.7	1	1	1	1		0			42.79	0.7	1	1		0			994	109.802	7.76709

## Sheet: peptide IDs
Sequence	# PSMs	# Proteins	# Protein Groups	Protein Group Accessions	Modifications	MH+ [Da]	A2	IonScore A2	Exp Value A2	B2	IonScore B2	Exp Value B2	C2	IonScore C2	Exp Value C2	# Missed Cleavages	Charge A2	m/z [Da] A2	RT A2	Charge B2	m/z [Da] B2	RT B2	Charge C2	m/z [Da] C2	RT C2
LGARILL	4	2	1	A0A4P1R959		755.514							High	28.72	0.074792	0							2	378.261	31.9352
VGEIISRF	1	1	1	A0A4P1RVL2		920.518							High	46.18	0.0206228	0							2	460.762	35.5705
AHIPGVVEL	1	1	1	A0A4P1RMC5		934.536							High	46.27	0.0118118	0							2	467.772	37.2584
SKISPLPVL	1	2	1	A0A4P1RQK2		953.604	High	37.78	0.0118958							0	2	477.306	38.3722
VPIPVPLPF	4	2	1	A0A4P1QRT1		978.602	High	42.14	0.0102883				High	37.42	0.030503	0	2	489.805	73.1932				2	489.805	73.1987
SSNIIRFF	1	1	1	A0A4P1RP06		983.531	High	48.51	0.00813582							0	2	492.269	45.3177
LEVPTIDLK	1	1	1	A0A394DF71		1027.61	High	43.41	0.0167776							0	2	514.309	42.6097
ISPPTLRPR	2	1	1	F5B8V6		1036.63	High	39.16	0.015495				High	33.54	0.0565185	0	2	518.817	30.4361				2	518.818	30.6383
INEGGLLLPH	1	2	1	A0A1J7G5F6		1062.59	High	50.26	0.00624708							0	2	531.801	37.7506
NDEDLIRIL	2	1	1	A0A1J7HUX7		1100.59							High	42.04	0.0490417	0							2	550.8	51.997
VFRGIPAEVL	3	2	2	F5B8V7;F5B8V8		1100.65	High	44.06	0.0222512				High	41.86	0.0371787	0	2	550.828	41.7124				2	550.827	42.6158
SHQDEGVIVR	1	8	5	F5B8W2;A0A1J7G5F6;F5B8W3;F5B8W1;B8Q5G0		1139.58							High	45.07	0.0258506	0							2	570.295	20.2803
NALEPDNRVE	1	1	1	F5B8V7		1156.56	High	46.99	0.0161989							0	2	578.784	22.8822
SYQDEGVIVR	1	3	1	B0YJF7		1165.58							High	54.65	0.003821	0							2	583.296	26.8256
NALEPDNRIE	1	1	1	F5B8V8		1170.58							High	40.24	0.078514	0							2	585.792	25.4019
RIGPVELPYTL	1	1	1	A0A4P1RE09		1257.72							High	39.66	0.0700877	0							2	629.364	51.3841
ERLKQIVRVK	1	1	1	F5B8V7		1268.82							High	35.5	0.0260137	0							3	423.61	26.197
GHAPISLPNQLF	1	2	1	A0A4P1RSN4		1293.69							High	50.39	0.00802363	0							2	647.35	48.2637
LNIDEDTVHKL	1	1	1	F5B8V8		1296.68							High	40.15	0.0799552	0							2	648.842	31.0956
THYEEIQRIL	1	2	1	F5B8W3		1301.69							High	42.26	0.0624542	0							2	651.347	33.7903
FEDNAGVIVNPK	2	3	1	A0A1J7HK98		1302.67	High	71.93	7.01419e-05				High	42.54	0.0610258	0	2	651.841	29.5375				2	651.841	29.732
ILNPDDNQNLR	1	9	5	F5B8W2;B0YJF7;A0A1J7G5F6;F5B8W1;B8Q5G0		1311.67	High	66.38	0.000220524							0	2	656.34	25.6599
YEGGIKLPLDVI	1	1	1	A0A4P1RE09		1316.75							High	40.82	0.0561966	0							2	658.877	59.7439
TSLDFPILRWL	1	1	1	F5B8V6		1360.77	High	53.61	0.00282713							0	2	680.888	80.6246
EQSHQDEGVIVR	1	8	5	F5B8W2;A0A1J7G5F6;F5B8W3;F5B8W1;B8Q5G0		1396.68	High	50.06	0.0101685							0	3	466.232	20.4487
RADLYNPNAGRIS	1	1	1	F5B8V7		1446.74							High	50.08	0.0117137	0							2	723.876	25.046
EETVRSIELPGLL	1	3	1	A0A1J7HK42		1455.81							High	50.26	0.00681551	0							2	728.408	55.8617
SIIEEFPRLVTW	2	1	1	A0A1J7HTK9		1489.81	High	58.37	0.00141973							0	2	745.407	69.2188
GLHLPSYTNYPQL	2	2	2	F5B8V7;F5B8V8		1502.77							High	46.78	0.0237883	0							2	751.886	48.3918
VGGKIIREPGPLPGL	1	1	1	A0A1J7G4N6		1502.91							High	36.1	0.0406745	0							2	751.959	36.3581
VDHIDFSDETDTK	1	1	1	A0A4P1QWQ4		1521.67							High	66.57	0.000110069	0							2	761.338	26.9812
GRQQEQQLEGELE	1	2	1	F5B8X0		1543.74							High	49.53	0.0104448	0							2	772.373	28.0541
DIWDPFQDFPLR	2	2	1	A0A4P1QV48		1548.75	High	51.24	0.00837496							0	2	774.878	78.4467
ALIQRPSITDPFAQ	2	1	1	A0A1J7G4N6		1556.85	High	47.99	0.0143327				High	48.36	0.0124707	0	2	778.926	47.3977				2	778.926	47.6734
TFPGSAQDVERLIK	1	3	1	B0YJF7		1560.84							High	46.23	0.0265831	0							2	780.923	41.2894
KAKNELRDSFKLL	1	1	1	A0A4P1R0V6		1561.91							High	36.99	0.0637156	0							2	781.46	29.3614
HLPSYTNYPQIIM	1	1	1	F5B8V8		1576.78							High	48.61	0.0173432	0							2	788.895	48.5027
HFWQVDKGHTLPL	1	1	1	A0A4P1QZY1		1577.82							High	46.08	0.030299	0							3	526.613	36.5015
FREGDIIAIPPGIPY	4	1	1	F5B8V7		1657.9	High	62.81	0.000547058							0	2	829.451	61.9161
SYILNPDDNQDLRV	1	2	1	F5B8W3		1661.81	High	48.81	0.0156604							0	2	831.41	44.1303
AATSPVKQVFRGIPAE	1	1	1	F5B8V7		1670.93							High	44.28	0.0309947	0							2	835.967	34.0161
LGNKVTKEKLLDSIE	1	1	1	A0A1J7HGK1		1686.97							High	38.3	0.078659	0							2	843.988	29.9943
EINEGALLLPHYNSK	1	7	4	F5B8W2;B0YJF7;F5B8W1;B8Q5G0		1697.89							High	48.47	0.0155482	0							2	849.448	37.0797
LIFPGSAEDVERLIR	1	2	1	F5B8W3		1714.95							High	41.87	0.0566556	0							3	572.32	54.8959
EEEEEEEEEPRQR	1	1	1	F5B8V7		1717.72	High	72.23	1.45833e-05							0	3	573.244	17.0207
QNPNERIKQIIRVE	1	1	1	F5B8V8		1736.98							High	50.15	0.00530797	0							2	868.994	29.1943
GLHLPSYTNYPQIIM	4	1	1	F5B8V8		1746.89	High	48.71	0.0172418				High	45.75	0.0340706	0	2	873.948	57.8565				2	873.948	57.3706
GLHLPSYTNYPQLIF	1	1	1	F5B8V7		1762.92	High	55.5	0.00373393							0	2	881.962	66.1678
NHPEVVAEEPWYGIE	1	1	1	A0A394D9J7		1768.81	High	74.95	2.54776e-05							0	2	884.909	47.065
GNFYEITPDRNPQVQ	1	2	1	F5B8W3		1777.86	High	54.16	0.00440151							0	2	889.432	35.6773
QGREEEEEEEEEEE	2	1	1	F5B8V6		1779.67	High	33.59	0.0184634				High	40.44	0.00410709	0	2	890.339	18.6197				2	890.34	18.9926
KEEEEEEDEPRSRE	1	1	1	F5B8V7		1790.77	High	46.32	0.00847279							0	3	597.594	15.843
SIEDPFDQDDWEHY	1	5	1	A0A1J7FW36		1795.71	High	39.42	0.0106173							0	2	898.357	60.9157
WVFPDQALPNDLIKR	1	1	1	A0A4P1RE09		1811.98	High	46.42	0.0205846							0	3	604.666	52.3716
KGILDKIKDKLPGHHN	1	1	1	A0A4P1QYM6		1813.04	High	51.06	0.00371267							0	3	605.02	29.1367
YFREGDIIAIPPGIPY	1	1	1	F5B8V7		1820.96							High	43.14	0.0597245	0							2	910.983	62.622
GRQGEEQEEESESEQE	1	1	1	F5B8V7		1879.74	High	38.74	0.011889							0	2	940.375	16.9821
SDKLSKGDVFIIPAGHPL	2	2	1	B8Q5G0		1894.05	High	47.86	0.0126992				High	43.51	0.0359667	0	2	947.527	37.63				2	947.525	37.7041
QGREEEEEEEEEEEE	1	1	1	F5B8V6		1908.72	High	36.09	0.00863589							0	2	954.863	19.6377
NWVFPDQALPNDLIKR	1	1	1	A0A4P1RE09		1926.02	High	52.9	0.00564301							0	3	642.679	53.1194
IADPTRADLYNPTAGRIS	1	1	1	F5B8V8		1931	High	52.87	0.00706509							0	2	966.001	35.0133
FTEINEGALLLPHYNSK	1	5	2	B0YJF7;B8Q5G0		1946							High	42.78	0.0719484	0							3	649.339	43.4037
NQRNFLAGSEDNVIRQL	1	6	4	F5B8W2;A0A1J7G5F6;F5B8W3;F5B8W1		1974.02							High	51.72	0.0090549	0							2	987.512	41.1375
LIFTEISEGALLLPHYNSK	1	2	1	F5B8W3		2145.16							High	42.36	0.0643516	0							3	715.725	60.8374
DTTSLLNQLDPSPRRFYIA	1	1	1	F5B8V7		2207.15	High	58.02	0.00229858							0	3	736.387	59.3803
KDPNYVDEEDEEEEDVKGF	1	1	1	A0A394D990		2285.96							High	35.35	0.0605658	0							3	762.657	36.506
ITLIDTTNLDNQLDQIPRRF	1	1	1	F5B8V6		2386.28							High	42.25	0.0767004	0							3	796.097	60.0581
KLRHNIGQSTSPDAYNPQAGRL	3	1	1	F5B8V6		2423.27	High	57.89	0.00248148				High	58.84	0.00187063	0	3	808.426	25.2364				3	808.429	25.4661
LIDTTNLDNQLDQIPRRFYL	1	1	1	F5B8V6		2448.29	High	59.95	0.0014367							0	3	816.768	63.1958
KLRHNIGQSTSPDAYNPQAGRLK	1	1	1	F5B8V6		2551.36	High	50.79	0.0110813							0	4	638.595	22.8414
NNNPYKFLVPPPQSQLR	1	1	1	F5B8V6		2012.07							High	45.55	0.0309106	0							2	1006.54	37.7272
EQEEEYEQGEEEVRRY	1	2	1	B8Q5G0		2101.89							High	37.95	0.0482417	0							3	701.302	28.7052
RIIGIDIDSK	1	1	1	A0A1J7FVK4		1129.66							High	42.2	0.0334601	0							2	565.333	30.2969
IERVLLGDDELQ	1	2	1	B8Q5G0		1399.75							High	44.64	0.031877	0							2	700.377	40.5808
SPVKQVFRGIPAE	1	1	1	F5B8V7		1427.81							High	40.21	0.0589971	0							2	714.406	30.7577
NYPADKVDEIFSR	1	1	1	A0A4P1RIP9		1553.76							High	50.33	0.0101534	0							2	777.383	37.3578
RREEEKEEEEEEDEPRSR	3	1	1	F5B8V7		2361.06	High	54.86	0.00210094	High	61.59	0.000444313				0	4	591.02	16.0713	4	591.019	16.2259
RTTRHRRAQGEEGEEEEEETSTR	1	1	1	F5B8V7		2773.29				High	52.08	0.0064363				0				3	925.1	16.2536
RHRRAQGEEGEEEEEETSTR	1	1	1	F5B8V7		2415.09				High	46.23	0.0165178				0				3	805.701	16.4315
RREEEKEEEEEEDEPRSRE	3	1	1	F5B8V7		2490.1	High	51.2	0.00389795	High	46.48	0.0114364				0	4	623.28	16.4836	3	830.704	16.687
GRQGEEQEEESESEQEGRGQ	2	1	1	F5B8V7		2277.95	High	55.19	0.000614766	High	63.13	9.14932e-05				0	3	759.988	17.205	3	759.987	17.4582
RAQGEEGEEEEEETSTR	2	1	1	F5B8V7		1965.83	High	70.95	2.13376e-05	High	71.83	1.76733e-05				0	3	655.948	17.6983	3	655.948	17.895
SQEEEEEEEEEPRQR	8	1	1	F5B8V7		1932.81	High	61.63	0.000159915	High	66.49	5.226e-05	High	44.19	0.00887693	0	3	644.941	18.5864	3	644.941	18.7968	2	966.907	18.6053
RHRPHHHEEEEEEEEWSHQ	1	1	1	F5B8V6		2547.08				High	46.38	0.00600791				0				3	849.699	18.9965
RAQGEEGEEEEEETSTRVR	1	1	1	F5B8V7		2221				High	44.74	0.0240657				0				3	741.005	19.6855
HHEEEEEEEEWSH	6	1	1	F5B8V6		1735.65	High	46.32	0.000800376	High	55.58	0.000104452	High	37.29	0.00692427	0	3	579.22	20.497	3	579.221	20.6767	3	579.221	20.8416
FAEEDKKVKERIDAR	1	3	1	A0A4P1QS49		1833.98				High	45.93	0.0289974				0				3	611.999	20.9193
HHEEEEEEEEWSHQ	8	1	1	F5B8V6		1863.71	High	59.07	5.2525e-05	High	54.42	0.000158117	High	46.44	0.000954478	0	3	621.907	21.2115	3	621.907	21.3762	3	621.906	21.3876
WQEQEEEEEEKEEPRQR	6	1	1	F5B8V8		2288.01	High	47.99	0.00755989	High	49.68	0.00529729	High	44.79	0.0152788	0	3	763.339	21.2525	4	572.757	21.4164	3	763.339	21.393
HHEEEEEEEEWS	2	1	1	F5B8V6		1598.59				High	56.64	7.53277e-05	High	55.43	9.95302e-05	0				2	799.798	22.4177	2	799.798	22.4415
RRQEEEEEEEEWQPR	6	2	1	B8Q5G0		2058.91	High	68.04	8.8011e-05	High	69.74	5.85472e-05	High	43.9	0.0224039	0	2	1029.96	22.8502	2	1029.96	23.0251	3	686.975	22.9777
HHEEEEEEEEW	3	1	1	F5B8V6		1511.56	High	44.08	0.0015321	High	42.54	0.00232068	High	43.83	0.00160839	0	2	756.282	23.1748	2	756.283	23.3305	2	756.282	23.3571
HIDFSDETDTK	3	1	1	A0A4P1QWQ4		1307.57	High	61.4	0.000292708	High	77.22	8.88417e-06	High	51.63	0.00337832	0	2	654.285	23.3576	2	654.287	23.5159	2	654.289	23.5258
KVISPPTLRPR	2	1	1	F5B8V6		1263.79				High	37.63	0.00913831	High	28.02	0.0835345	0				3	421.935	24.0391	2	632.4	23.9944
SIISPKSQEEEEEEEEEPRQR	6	1	1	F5B8V7		2558.19	High	81.08	7.72734e-06	High	85.27	2.99529e-06	High	79.21	1.06947e-05	0	4	640.302	23.9343	3	853.401	24.1791	3	853.396	24.137
DQQRQQDEQEEEEEEVRRY	2	3	1	B0YJF7		2523.1				High	48.34	0.00614944	High	38.95	0.0477118	0				4	631.53	24.7928	3	841.703	24.7756
VKRGLSIISPKSQEEEEEEEEEPRQR	2	1	1	F5B8V7		3111.56	High	65.56	0.000533163	High	58	0.00304403				0	5	623.118	24.9148	5	623.119	25.081
NQQRQQDEQEVEEVRSY	6	2	1	F5B8W3		2164.98	High	58.76	0.00104494	High	69.4	9.2524e-05	High	81.83	4.90141e-06	0	2	1083	25.6438	2	1083	25.8249	2	1082.99	25.8157
NVVRDIEKVGSGSGK	3	1	1	A0A4P1R9Q2		1544.84	High	47.78	0.0175028	High	49.43	0.0121482	High	45.04	0.032688	0	3	515.618	25.6529	3	515.619	25.8773	3	515.618	25.8637
LVPPPQSQLR	3	1	1	F5B8V6		1134.66	High	51.85	0.00224873	High	47.94	0.00540414	High	47.64	0.00596627	0	2	567.836	25.8277	2	567.836	26.0685	2	567.835	26.0213
HLHTDEEIRFA	1	1	1	A0A1J7HAK7		1367.67				High	45.3	0.0290104				0				3	456.561	26.1954
QNPDERLKQIVRVK	5	1	1	F5B8V7		1723				High	41.07	0.028545	High	39.68	0.0395601	0				2	862.003	26.4892	3	575.005	25.8274
RGLSIISPKSQEEEEEEEEEPRQR	11	1	1	F5B8V7		2884.39	High	72.13	9.46786e-05	High	60.45	0.00143052	High	64.43	0.000532665	0	4	721.854	26.7475	4	721.855	26.5816	5	577.683	26.6956
SPKSQEEEEEEEEEPRQR	2	1	1	F5B8V7		2245				High	56.86	0.00124977	High	53.33	0.00261801	0				3	749.005	26.8578	3	749.003	26.874
VKEGLKVISPPTLRPR	4	1	1	F5B8V6		1790.1	High	41.7	0.00483737	High	43.58	0.00280221	High	42.55	0.00318811	0	3	597.371	27.6411	4	448.281	27.7224	4	448.282	27.7982
TSPDAYNPQAGRL	3	1	1	F5B8V6		1389.68	High	63.51	0.000457934	High	56.54	0.00227487	High	62.04	0.000627892	0	2	695.342	27.77	2	695.343	27.9457	2	695.34	28.0595
QRQQDEQEEEYEQGEEEVRRY	6	2	1	B8Q5G0		2757.19	High	44.73	0.0125435	High	45.36	0.0115905	High	47.16	0.00672024	0	4	690.055	28.5239	3	919.738	28.6585	3	919.736	28.7355
TVGNVGEKIKKPFESITK	3	1	1	A0A1J7IAA6		1975.12	High	45.61	0.013859	High	41.16	0.0385363	High	38.3	0.0763442	0	4	494.537	28.6224	4	494.537	28.7868	4	494.537	28.8913
GLKVISPPTLRPR	12	1	1	F5B8V6		1433.9	High	39.84	0.00702407	High	41.94	0.004331	High	40.77	0.00567007	0	2	717.452	28.8046	2	717.452	28.9619	3	478.637	28.6599
NVVRDIEKVGSGS	3	1	1	A0A4P1R9Q2		1359.72	High	60.16	0.00116517	High	55.89	0.00277753	High	59.7	0.00121333	0	2	680.366	28.9829	2	680.366	29.1846	2	680.368	29.1891
EVKEGLKVISPPTLRPR	5	1	1	F5B8V6		1919.14	High	38.41	0.0209972	High	65.33	4.69089e-05	High	53.84	0.000601397	0	3	640.387	28.8624	3	640.386	29.3415	3	640.387	29.0762
LGNKVTKEKLLDSIEGH	4	1	1	A0A1J7HGK1		1881.04	High	57.22	0.00127259	High	57.57	0.00114571	High	57.92	0.00119333	0	3	627.687	29.4827	3	627.688	29.6959	3	627.685	29.7171
KFLVPPPQSQLR	13	1	1	F5B8V6		1409.83	High	47.07	0.00564368	High	42.98	0.0145814	High	47.49	0.00435257	0	3	470.614	29.7115	3	470.614	29.902	3	470.615	29.9336
VGGKIIREPGPLPGLK	3	1	1	A0A1J7G4N6		1631	High	51.53	0.000634523	High	59.12	0.000122951	High	49.96	0.000933054	0	2	816.005	29.8794	2	816.005	30.0726	2	816.006	30.0813
EGLKVISPPTLRPR	15	1	1	F5B8V6		1562.94	High	49.36	0.00191662	High	49.38	0.00195799	High	42.48	0.0102112	0	2	781.974	30.3266	2	781.973	30.1392	2	781.973	30.465
VTKEKLLDTITGH	5	1	1	A0A1J7HWZ3		1454.82	High	69.89	5.75698e-05	High	84.49	2.01679e-06	High	65.08	0.000175268	0	2	727.915	30.1074	2	727.914	30.3011	2	727.913	30.3243
SEDNVIRQL	1	7	4	A0A1J7G5F6;F5B8W2;F5B8W3;F5B8W1		1073.56				High	47.21	0.0161639				0				2	537.283	30.363
NVVRDIEKVGSGSGKTSRPVTIA	3	1	1	A0A4P1R9Q2		2370.33	High	57.9	0.00114686	High	54.81	0.00257308	High	51.92	0.00565694	0	3	790.78	30.7008	3	790.778	30.8642	3	790.774	30.9263
DQQRQQDEQEEEYEQGEEEVRRY	11	2	1	B8Q5G0		3000.29	High	56.63	0.000565228	High	59.53	0.000344651	High	55.47	0.000800577	0	3	1000.76	30.47	3	1000.77	30.9622	3	1000.77	31.1686
RRLLPEQGTEEYDEMVK	2	1	1	A0A4P1RE09		2093.03				High	51.07	0.0111253	High	45.27	0.0410655	0				3	698.349	31.5882	3	698.349	31.7467
ALNIDEDTVHKL	3	1	1	F5B8V8		1367.72	High	48.76	0.0121743	High	48.73	0.0126934	High	53.06	0.00435685	0	2	684.364	31.7832	2	684.365	31.8752	2	684.362	31.9556
ILNPDDNQNLRVA	3	2	1	B8Q5G0		1481.77	High	65.57	0.000297439	High	66.3	0.000250082	High	61.53	0.000751479	0	2	741.39	31.9991	2	741.39	32.1113	2	741.39	32.1572
QDEQEEEYEQGEEEVRRY	3	2	1	B8Q5G0		2344.97	High	65.6	5.04162e-05	High	60.37	0.000141699	High	55.74	0.000525238	0	3	782.329	32.0977	3	782.326	32.1511	3	782.331	32.2562
NARLSEGDIL	2	2	1	F5B8W3		1087.58	High	51.66	0.0060909	High	50.36	0.00968911				0	2	544.292	32.0802	2	544.289	32.1759
GERPSQGIGETISQY	3	1	1	A0A1J7IAA6		1621.78	High	61.25	0.000861141	High	62.56	0.000636267	High	61.56	0.000803037	0	2	811.395	32.2805	2	811.395	32.3411	2	811.395	32.4516
YILNPDDNQNLR	3	10	5	A0A1J7G5F6;F5B8W2;B0YJF7;F5B8W1;B8Q5G0		1474.73	High	60.62	0.000969827	High	65.43	0.000311751	High	59.79	0.00117334	0	2	737.868	32.3893	2	737.868	32.4418	2	737.872	32.5376
NMVDPDEKDSTGNLPSRAL	4	1	1	A0A4P1R4M4		2058.98	High	58.23	0.00160844	High	70.76	9.80657e-05	High	83.81	4.65882e-06	0	2	1029.99	32.7196	2	1030	32.6772	2	1029.99	32.825
KNNNPYKFLVPPPQSQLR	17	1	1	F5B8V6		2140.17	High	54.37	0.00347516	High	60.53	0.000837629	High	60.1	0.00084145	0	2	1070.59	32.7682	2	1070.59	33.0902	2	1070.59	32.8906
KLAIPINNPGKL	4	2	1	B8Q5G0		1277.8	High	48.12	0.00113007	High	39.2	0.0114456	High	32.32	0.0417623	0	2	639.402	33.0771	3	426.603	33.1254	2	639.402	33.229
KIGGLPVVEGPKKRIIGNL	2	1	1	A0A4P1R8F7		1988.24				High	32.87	0.0186168	High	30.96	0.0287802	0				3	663.417	33.2732	3	663.417	33.5408
KNNNPYKFLVPPPQSQ	2	1	1	F5B8V6		1870.98				High	49.63	0.0127002	High	44.64	0.0396517	0				3	624.332	33.6076	3	624.332	33.4211
SYILNPDDNQNLR	4	10	5	F5B8W2;B0YJF7;A0A1J7G5F6;F5B8W1;B8Q5G0		1561.75	High	62.63	0.000575747	High	47.43	0.0199873	High	45.72	0.029712	0	2	781.377	33.6755	2	781.382	33.6669	2	781.383	33.8451
AATSPVKQVFRGIPA	3	1	1	F5B8V7		1541.88	High	53.12	0.00247031	High	57.3	0.00102452	High	61.3	0.000480035	0	2	771.446	33.7588	2	771.447	33.7219	2	771.444	33.9021
VNFPIISDPKRE	10	1	1	A0A4P1R4M4		1414.77	High	57.29	0.00155572	High	57.27	0.00171928	High	61.72	0.000598209	0	2	707.89	34.0704	2	707.889	34.0639	2	707.888	34.2251
RVLLGDDELQEN	4	2	1	B8Q5G0		1400.7	High	60.55	0.000922194	High	53.57	0.00409191	High	47.61	0.0163801	0	2	700.856	34.1027	2	700.855	34.2018	2	700.853	34.2026
LKLPEGSNDVLLK	2	2	1	A0A1J7IM68		1425.83	High	62.08	0.000229534	High	71.6	2.56393e-05				0	3	475.949	34.7928	3	475.949	34.7263
SARLSEGDIF	2	5	3	F5B8W2;B0YJF7;F5B8W1		1094.55				High	49.93	0.0104282	High	49.6	0.0116567	0				2	547.778	34.9301	2	547.778	35.1208
NLDNQLDQIPR	6	1	1	F5B8V6		1325.68	High	59.79	0.000982267	High	62.36	0.000543537	High	59.4	0.00113185	0	2	663.344	35.2237	2	663.344	35.1281	2	663.344	34.9956
KFVVDMPGLK	2	1	1	A0A4P1QWQ4		1133.64				High	46.71	0.0149324	High	46.57	0.0154216	0				2	567.325	35.3233	2	567.324	35.5307
LAGSEDNVIRQL	3	7	4	F5B8W2;A0A1J7G5F6;F5B8W3;F5B8W1		1314.7	High	81.63	6.69926e-06	High	79.64	9.81097e-06	High	76.1	2.01728e-05	0	2	657.854	35.5365	2	657.853	35.4388	2	657.855	35.6746
GKMDVDQDLRDVEVS	2	1	1	A0A4P1R354		1705.8				High	53.29	0.00441693	High	46.27	0.0228081	0				2	853.403	35.444	2	853.405	35.6591
RLLPEQGTEEYDEMVK	3	1	1	A0A4P1RE09		1936.93	High	62.95	0.000649024	High	78.6	1.7671e-05	High	74.61	4.18639e-05	0	2	968.97	35.7781	2	968.97	35.5634	2	968.967	35.7607
VVVNIPVTVK	3	1	1	A0A1J7HWZ3		1067.68	High	45.31	0.00172985	High	60.24	8.57764e-05	High	60.43	5.32118e-05	0	2	534.345	35.7087	2	534.345	35.6301	2	534.345	35.8243
FLVPPPQSQLR	9	1	1	F5B8V6		1281.74	High	56.71	0.000991013	High	53.79	0.00156457	High	62.08	0.000228047	0	2	641.37	35.5398	2	641.373	35.8397	2	641.372	36.0677
TFPGSAQDVERL	9	3	1	B0YJF7		1319.66	High	71.17	8.85782e-05	High	71.81	8.11146e-05	High	67.9	0.000190774	0	2	660.333	36.3516	2	660.334	36.1398	2	660.334	36.0449
KTNDQATTSPLKQVFRGIPAE	3	1	1	F5B8V8		2301.22	High	53.34	0.00578961	High	50.3	0.0126097	High	58.37	0.00190396	0	3	767.748	36.3216	3	767.745	36.2885	3	767.744	36.4571
SIRALPLDVVAH	1	1	1	F5B8V6		1290.76				High	42.13	0.0223722				0				2	645.882	36.3018
ILNPDDNQNLRVV	8	8	4	F5B8W2;B0YJF7;A0A1J7G5F6;F5B8W1		1509.8	High	75.14	2.94928e-05	High	75.09	3.20041e-05	High	74.83	3.19644e-05	0	2	755.406	36.4435	2	755.405	36.3384	2	755.404	36.8214
YSLKPLVPRLS	2	3	1	A0A1J7HFV8		1272.77	High	42.58	0.014296	High	39	0.029377				0	2	636.889	36.5356	2	636.891	36.45
IIRVEEGLGVISPK	6	1	1	F5B8V8		1509.9	High	46.65	0.00503913	High	42.24	0.0128213	High	49.31	0.00272946	0	3	503.971	36.5105	3	503.973	36.4823	3	503.971	37.0059
KTNDLAATSPVKQVFRGIPAE	3	1	1	F5B8V7		2242.22	High	48.86	0.0131018	High	69.72	0.000108814	High	47.79	0.0169676	0	3	748.079	36.7149	3	748.079	36.6528	3	748.077	36.7629
SELSGKRPLFGPDLPQTE	1	3	1	A0A1J7HBL1		1971.02				High	45.57	0.0359921				0				2	986.014	36.9579
TFPGSTEDVERL	15	1	1	F5B8W2		1350.65	High	86.68	2.31107e-06	High	86.42	2.33393e-06	High	86.61	2.211e-06	0	2	675.831	37.3042	2	675.83	37.2242	2	675.831	36.7133
ALPLDVVAH	3	1	1	F5B8V6		934.536	High	51.45	0.00354956	High	78.19	7.51926e-06	High	72.67	2.68025e-05	0	2	467.771	37.5549	2	467.772	37.5	2	467.771	37.6341
RPSITDPFAQ	2	1	1	A0A1J7G4N6		1131.58				High	44.35	0.0386932	High	49.18	0.013455	0				2	566.291	37.5243	2	566.293	37.6748
TEINEGALLLPHYNSK	3	5	2	B0YJF7;B8Q5G0		1798.93	High	48.24	0.0176048	High	45.76	0.0315035	High	51.79	0.00793203	0	2	899.971	37.6057	2	899.971	37.6219	2	899.97	37.6855
SIRAGLQFPVGRIG	3	2	1	A0A4P1R144		1470.86	High	46.08	0.0105078	High	51.05	0.0033612	High	47.17	0.00817545	0	2	735.935	37.6447	2	735.934	37.634	2	735.935	37.7216
SDKLSKGDVFIIPA	5	2	1	B8Q5G0		1489.83	High	52.06	0.00448616	High	59.18	0.000923072	High	66.25	0.000187196	0	2	745.42	37.7602	2	745.419	37.7247	2	745.417	37.8604
SLLNQLDPSPR	4	1	1	F5B8V7		1239.67	High	48.35	0.011046	High	50.58	0.00687344	High	50.55	0.00675412	0	2	620.334	41.2483	2	620.338	37.8436	2	620.335	37.9293
SKGDVFIIPAGHPL	1	2	1	B8Q5G0		1450.81				High	47.7	0.0102379				0				2	725.91	37.9728
TEISEGALLLPHYNSK	4	2	1	F5B8W3		1771.93	High	64.47	0.000421368	High	74.08	4.34635e-05	High	68.97	0.000152999	0	2	886.466	38.0337	2	886.469	38.0237	2	886.468	38.1066
QIIRVEEGLGVISPK	23	1	1	F5B8V8		1637.96	High	92.64	1.74377e-07	High	92.5	1.72976e-07	High	87.54	5.44186e-07	0	2	819.482	39.1977	2	819.483	38.1068	2	819.483	39.301
VDEEIINRL	7	1	1	F5B8V7		1100.59	High	53.35	0.00372078	High	53.42	0.00356802	High	53.54	0.00347078	0	2	550.798	38.459	2	550.8	38.1099	2	550.8	38.2383
GLHLPSYTNYPQ	1	2	2	F5B8V7;F5B8V8		1389.68				High	46.72	0.0237979				0				2	695.344	38.1131
RLLPEQGTEEYDEM	3	1	1	A0A4P1RE09		1709.77				High	56.19	0.0016506	High	40.66	0.0619993	0				2	855.387	39.2667	2	855.389	39.3709
VVDEGEGNYELVGIR	3	11	5	B0YJF7;A0A1J7G5F6;F5B8W3;F5B8W1;B8Q5G0		1648.81	High	110.46	1.17308e-08	High	106.12	2.98184e-08	High	117.26	2.35281e-09	0	2	824.915	39.4565	2	824.907	39.4454	2	824.911	39.586
YILNPDDNQNLRVA	3	2	1	B8Q5G0		1644.83	High	82.39	6.85891e-06	High	90.24	1.12527e-06	High	90.69	1.03882e-06	0	2	822.921	39.5334	2	822.92	39.5276	2	822.921	39.6581
MFPGIADRM	2	15	1	A0A1J7FNK7		1037.49	High	51.35	0.00696073	High	54.68	0.00290794				0	2	519.248	39.6975	2	519.249	39.6323
ILNPDDNQDLRVV	11	2	1	F5B8W3		1510.79	High	79.8	1.18299e-05	High	75.95	2.85491e-05	High	79.67	1.21964e-05	0	2	755.897	39.6768	2	755.897	39.6641	2	755.897	39.7758
KFYGKNPLESEDLSRIV	2	1	1	A0A4P1QZ06		1995.06	High	61.73	0.0007895	High	69.19	0.000139778				0	3	665.692	39.7804	3	665.692	39.7312
LQRLLLI	6	2	1	A0A1J7HYZ3		868.598	High	29.65	0.0147956	High	33.1	0.00668548	High	25.09	0.0422798	0	2	434.803	39.7366	2	434.803	39.7479	2	434.803	40.089
QLRILIL	2	1	1	A0A4P1QP48		868.598				High	42.79	0.000718014	High	23.1	0.0668548	0				2	434.803	39.7479	2	434.803	40.089
QRLLLLL	1	0	0			868.598				High	33.41	0.0062249				0				2	434.803	39.7479
GAILRLLL	1	0	0			868.598				High	27.18	0.0261296				0				2	434.803	39.7479
QIIRLLL	1	0	0			868.598				High	27.18	0.0261296				0				2	434.803	39.7479
KFYPIDMDDGVEVR	3	1	1	A0A4P1RA46		1683.8	High	68.24	0.000151131	High	54.41	0.00399246	High	42.68	0.0548709	0	2	842.404	39.9901	2	842.407	39.9486	2	842.403	40.2368
GGAPSVDLILDKN	4	1	1	Q42369		1298.69	High	53.37	0.003535	High	63.65	0.000327545	High	65.21	0.000254373	0	2	649.851	39.9806	2	649.851	39.985	2	649.851	40.4842
PDQALPNDLIKR	2	1	1	A0A4P1RE09		1379.76	High	57.05	0.00148839	High	59.81	0.000689881				0	3	460.594	39.9701	3	460.592	40.0733
QVEDPQINDDEVLIR	2	1	1	A0A4P1RMG0		1782.89				High	79.69	1.32246e-05	High	59.53	0.00145722	0				2	891.947	40.1601	2	891.947	40.324
SYILNPDDNQNLRVA	11	2	1	B8Q5G0		1731.87	High	82.96	6.28942e-06	High	82.15	8.02242e-06	High	78.76	1.74143e-05	0	2	866.437	40.6125	2	866.437	40.2516	2	866.437	40.7845
LENVIRDAVTY	2	2	1	A0A1J7GA13		1292.69	High	47.83	0.0164643	High	44.2	0.0396233				0	2	646.847	40.2885	2	646.847	40.2556
VFPDQALPNDLIKR	10	1	1	A0A4P1RE09		1625.91	High	73.26	2.99878e-05	High	72.67	3.52761e-05	High	72.89	3.33177e-05	0	2	813.458	40.386	2	813.455	40.4132	2	813.456	40.5467
IIREPGPLPGL	3	1	1	A0A1J7G4N6		1161.7	High	46.86	0.00462508	High	46.8	0.00455049				0	2	581.354	40.4345	2	581.355	40.4344
NQRNFLAGSEDNVIKQL	4	2	1	B8Q5G0		1946.01	High	83.17	6.47376e-06	High	68.7	0.000181712	High	58.11	0.00204839	0	2	973.51	40.581	2	973.51	40.5707	2	973.509	40.7511
TFPGSTEDVERLIK	8	1	1	F5B8W2		1591.84	High	55.8	0.00318881	High	54.4	0.00451742	High	58.4	0.00166283	0	2	796.422	40.7173	2	796.42	40.7182	2	796.423	40.5695
IQRPSITDPFAQ	2	1	1	A0A1J7G4N6		1372.72				High	45.43	0.028616	High	43.99	0.0399484	0				2	686.865	40.8546	2	686.866	41.0166
SPVKQVFRGIPAEVL	2	1	1	F5B8V7		1639.96				High	39.9	0.0356771	High	41.99	0.0220301	0				2	820.482	41.1855	2	820.482	41.3377
NVDEEIINRLQ	7	1	1	F5B8V7		1342.7	High	47.32	0.0187374	High	50.04	0.0100158	High	48.47	0.0133564	0	2	671.851	41.8958	2	671.851	41.1884	2	671.852	42.0753
PGSAEDVERL	9	3	2	F5B8W3;F5B8W1		1072.53	High	64.4	0.000248218	High	66.76	0.000144156	High	61.13	0.000550541	0	2	536.767	41.2678	2	536.767	41.2389	2	536.768	41.4566
RIIGVDLVPN	3	1	1	A0A1J7HUZ4		1095.65	High	50.71	0.00172511	High	51.37	0.00148189	High	51.79	0.00168335	0	2	548.33	41.3649	2	548.33	41.4027	2	548.33	41.5135
AKNPLDLLPPSKL	3	1	1	A0A4P1QP27		1405.84	High	40.54	0.0161913	High	38.32	0.0269212	High	34.83	0.063863	0	2	703.425	41.4678	2	703.425	41.5152	2	703.425	41.6369
RLINEPVEGGEGNLL	3	2	1	A0A1J7HWX4		1609.86	High	60.91	0.000784483	High	61.33	0.000770478	High	41.13	0.0713741	0	2	805.435	41.6377	2	805.433	41.6905	2	805.438	41.8072
ASDALDKLRFL	6	7	1	A0A4P1RRI4		1248.7	High	63.11	0.000417114	High	54.18	0.00326028	High	43.29	0.0337171	0	2	624.852	41.8326	2	624.851	41.8261	2	624.853	42.0423
SRIIGVDLVPN	1	1	1	A0A1J7HUZ4		1182.69				High	41.15	0.0259637				0				2	591.847	41.9875
NVDEEIINRL	23	1	1	F5B8V7		1214.64	High	56.15	0.00210351	High	53.16	0.00412122	High	43.76	0.0359174	0	2	607.822	45.5888	2	607.823	42.0318	2	607.823	44.1984
IERVLLGDDELQE	6	2	1	B8Q5G0		1528.79	High	56.13	0.00276618	High	49.99	0.0106385	High	45.91	0.028526	0	2	764.897	41.3742	2	764.896	42.1521	2	764.896	41.8326
IFPGSAEDVERL	19	3	2	F5B8W3;F5B8W1		1332.68	High	65.2	0.000363798	High	68.6	0.000150855	High	74.86	3.93424e-05	0	2	666.844	40.845	2	666.844	42.3541	2	666.844	41.0894
ATRTILFL	6	4	2	A0A4P1RE09;A0A4P1RQK2		934.573	High	39.48	0.0144789	High	39.68	0.0138272				0	2	467.79	42.4824	2	467.79	42.6092
VQIVGDDLLVTNPK	2	4	1	A0A1J7FW36		1510.85				High	43.79	0.0236283	High	41.69	0.0343496	0				2	755.93	42.6409	2	755.935	42.7758
HLPSYTNYPQIIM	1	1	1	F5B8V8	M13(Oxidation)	1592.78				High	45.04	0.0371639				0				2	796.893	42.6892
SDALDKIRFL	2	7	1	A0A4P1RRI4		1177.66				High	47.38	0.0144237				0				2	589.331	42.7214
RDSFGNDIIKDL	1	1	1	A0A1J7HUX7		1392.71				High	54.91	0.00391019				0				2	696.86	43.2095
FVVDMPGLK	6	1	1	A0A4P1QWQ4		1005.54	High	50.49	0.00852928	High	50.67	0.00806558	High	50.5	0.00831359	0	2	503.275	43.4849	2	503.275	43.4821	2	503.276	43.6683
GVLIPDQGIALR	3	3	1	A0A1J7IB35		1251.74	High	73.77	1.1365e-05	High	51.5	0.00186154	High	48.06	0.00424785	0	2	626.375	43.6351	2	626.374	43.6451	2	626.375	43.7339
YILNPDDNQNLRVV	10	8	4	F5B8W2;B0YJF7;A0A1J7G5F6;F5B8W1		1672.86	High	88.85	1.55715e-06	High	84	4.89433e-06	High	84.28	4.50457e-06	0	2	836.936	44.3715	2	836.935	44.0459	2	836.937	44.803
NLDNQLDQIPRRFY	1	1	1	F5B8V6		1791.91				High	48.69	0.0186904				0				3	597.977	44.1592
LIQRPSITDPFAQ	1	1	1	A0A1J7G4N6		1485.81				High	47.47	0.0159552				0				2	743.408	44.186
IERVLLGDDELQEN	22	2	1	B8Q5G0		1642.83	High	61.05	0.000900862	High	63.81	0.00048543	High	59.73	0.00122036	0	2	821.919	40.7644	2	821.92	44.2811	2	821.92	44.2124
KGERILVL	1	2	1	A0A1J7HE31		927.6				High	38.13	0.0222725				0				2	464.303	44.6435
LTFPGSAQDVERL	3	3	1	B0YJF7		1432.74	High	77.95	1.81167e-05	High	78.66	1.66797e-05	High	60.92	0.000941788	0	2	716.877	44.8088	2	716.876	44.8303	2	716.875	44.9425
PGSVEDVERL	14	3	1	A0A1J7G5F6		1100.56	High	70.96	5.98974e-05	High	71.34	5.19301e-05	High	62.08	0.000512061	0	2	550.784	44.8458	2	550.783	44.886	2	550.783	44.9829
REPGPVEGGTTIIAF	13	1	1	A0A1J7G4N6		1543.81	High	91.8	7.39911e-07	High	91.79	7.32842e-07	High	78.91	1.41022e-05	0	2	772.41	44.8536	2	772.411	44.895	2	772.41	44.9886
SYILNPDDNQNLRVV	6	8	4	A0A1J7G5F6;F5B8W2;B0YJF7;F5B8W1		1759.9	High	74.75	4.36376e-05	High	82.28	7.57347e-06	High	82.19	7.73205e-06	0	2	880.451	45.3519	2	880.452	45.008	2	880.452	45.1081
AFNYPADKVDEIFSR	5	1	1	A0A4P1RIP9		1771.86	High	71.11	8.9764e-05	High	65.72	0.000308104	High	45.6	0.0316695	0	2	886.435	45.2211	3	591.292	45.2466	2	886.433	45.3295
DLAATSPVKQVFRGIPA	2	1	1	F5B8V7		1770	High	93.53	2.72753e-07	High	84.58	2.32602e-06				0	2	885.503	45.4399	2	885.502	45.4735
KISGGAPSVDLIL	10	1	1	Q42369		1269.74	High	75.95	1.00279e-05	High	66.51	8.78464e-05	High	42.64	0.0239418	0	2	635.376	45.2563	2	635.376	45.5911	2	635.376	45.7754
DLAATSPVKQVFRGIPAE	3	1	1	F5B8V7		1899.04	High	66.73	0.00020071	High	63.06	0.000450169	High	55.63	0.00267605	0	2	950.022	45.6021	2	950.024	45.6054	2	950.021	45.717
IFPGSAEDVERLIK	8	1	1	F5B8W1		1573.85	High	50.08	0.00895747	High	56.71	0.00200752	High	56.1	0.00238168	0	2	787.436	45.9117	2	787.43	45.6217	2	787.434	46.0168
TFPGSVEDVERL	32	3	1	A0A1J7G5F6		1348.68	High	86.58	2.40083e-06	High	86.75	2.67525e-06	High	86.54	2.62989e-06	0	2	674.841	43.9398	2	674.842	45.757	2	674.841	45.5933
YEGGIKLPTNVL	1	1	1	A0A4P1RQK2		1303.73				High	44.83	0.0259694				0				2	652.367	46.1529
GNIFDGIQRPL	2	3	1	A0A1J7IPK2		1229.67	High	62.15	0.000526061	High	61.11	0.000771403				0	2	615.336	46.1237	2	615.335	46.2148
ADENQRNFLAGSEDNVIRQL	4	7	4	F5B8W2;A0A1J7G5F6;F5B8W3;F5B8W1		2289.12	High	57.91	0.00230932	High	51.04	0.0112327	High	52.35	0.00855663	0	3	763.713	46.2826	3	763.713	46.3206	3	763.713	46.1488
IFPGSAEDVERLIR	9	2	1	F5B8W3		1601.87	High	50.15	0.0104647	High	48.87	0.0131255	High	52.43	0.00557792	0	3	534.626	46.7578	3	534.627	46.7832	3	534.627	48.0957
GLTFPGSTEDVERL	5	1	1	F5B8W2		1520.76	High	90.19	1.16739e-06	High	90.6	1.11322e-06	High	77.33	2.22449e-05	0	2	760.884	46.711	2	760.884	46.849	2	760.883	46.8881
GVSRIIGVDLVPN	9	1	1	A0A1J7HUZ4		1338.77	High	60.07	0.000379385	High	55.07	0.0011823	High	62.64	0.000206884	0	2	669.891	46.5992	2	669.891	47.0071	2	669.891	47.1229
KTNDLAATSPVKQVFRGIPAEVL	5	1	1	F5B8V7		2454.38	High	55.07	0.00200146	High	45.54	0.0179798	High	47.57	0.0120477	0	3	818.797	47.0252	3	818.797	47.0633	3	818.796	46.8208
IDTTNLDNQLDQIPRRF	4	1	1	F5B8V6		2059.06				High	45.28	0.0411326	High	53.7	0.00600731	0				3	687.024	47.5619	3	687.024	48.6834
ARDIWNIEPVKLP	1	1	1	A0A1J7I151		1550.88				High	42.59	0.0264525				0				2	775.944	47.5942
PGSAEDVERLIR	2	2	1	F5B8W3		1341.71				High	48.24	0.0133292				0				3	447.909	47.7737
TSLDFPILR	9	1	1	F5B8V6		1061.6	High	66.6	0.000160024	High	69.41	7.00939e-05	High	66.18	0.000176019	0	2	531.304	47.9312	2	531.303	47.9634	2	531.304	47.8038
GQNPLFPRIL	11	1	1	A0A1J7HUZ4		1154.67	High	44.19	0.0132535	High	44.2	0.0161029	High	44.07	0.0136248	0	2	577.838	47.9867	2	577.838	48.1349	2	577.838	47.8487
VFPDQALPNDLIK	1	1	1	A0A4P1RE09		1469.8				High	46.59	0.0167059				0				2	735.405	48.2927
YILNPDDNQDLRVV	17	2	1	F5B8W3		1673.85	High	89.16	1.4497e-06	High	88.76	1.65635e-06	High	94.13	4.61612e-07	0	2	837.429	47.9891	2	837.43	48.3067	2	837.429	47.6706
FIEINEGGLLLPHYNSK	2	3	1	A0A1J7G5F6		1944.03				High	52.81	0.00655417				0				3	648.68	48.4354
SGVSRIIGVDLVPN	2	1	1	A0A1J7HUZ4		1425.81				High	45.19	0.0164346	High	40.72	0.0460002	0				2	713.406	48.6053	2	713.406	48.6172
SYILNPDDNQDLRVV	23	2	1	F5B8W3		1760.88	High	83.36	5.95284e-06	High	83.11	6.49395e-06	High	83.21	6.31747e-06	0	2	880.945	48.9814	2	880.944	48.6441	2	880.945	48.7368
LTFPGSIEDVERL	1	2	1	B8Q5G0		1475.77				High	48.48	0.017409				0				2	738.387	49.3121
PGSIEDVERL	20	2	1	B8Q5G0		1114.57	High	69.66	8.10318e-05	High	69.81	8.65394e-05	High	69.7	8.02889e-05	0	2	557.79	49.4778	2	557.791	49.4573	2	557.79	50.3034
IDIGVPDEVGRL	5	7	1	A0A4P1RB37		1282.7	High	57.27	0.00139912	High	56.98	0.001478				0	2	641.853	49.5032	2	641.853	49.884
LDIVIPTIR	5	5	1	A0A1J7H0Z2		1039.65	High	52.08	0.000857306	High	57.32	0.000256529				0	2	520.331	49.6008	2	520.33	50.1182
IMLQLVILP	2	0	0			1039.65				High	36.38	0.031852				0				2	520.33	50.1182
ISERIVILP	2	0	0			1039.65				High	40.18	0.0132781				0				2	520.33	50.1182
QGDIIRVPSGTPVYL	5	1	1	A0A4P1RIP9		1614.89	High	59.79	0.00100945	High	61.32	0.000654226	High	43.87	0.0363687	0	2	807.946	49.8027	2	807.947	50.2665	2	807.947	50.3696
FIEINEGALLLPHYNSK	1	2	2	F5B8W2;F5B8W1		1958.05				High	55.02	0.00365013				0				3	653.356	50.3962
YSLAPLVPRL	3	1	1	A0A1J7HFP8		1128.68	High	57.36	0.00076804	High	54.6	0.00143514	High	53.77	0.00175543	0	2	564.843	50.4712	2	564.844	50.5899	2	564.843	50.7513
TFPGSVEDVERLIK	14	3	1	A0A1J7G5F6		1589.85	High	47.63	0.018967	High	50.34	0.0106308	High	50.89	0.0091752	0	2	795.431	49.5458	2	795.43	50.6067	2	795.431	50.3658
IFPGSAEDVERLIRNQ	4	2	1	F5B8W3		1843.97	High	52.2	0.00768022	High	48.94	0.0157283	High	45.09	0.0381664	0	3	615.327	51.375	3	615.327	51.0098	3	615.327	51.2102
VEQGLVKEPVFSF	4	1	1	A0A394D859		1478.79	High	51.89	0.00625981	High	45.95	0.0266472	High	43.34	0.0449242	0	2	739.9	50.965	2	739.9	51.0361	2	739.9	50.7456
SVLSPEELLAVR	3	1	1	A0A1J7I030		1312.75	High	51.96	0.00383988	High	55.86	0.00145715	High	65.27	0.000160574	0	2	656.876	50.9537	2	656.878	51.0972	2	656.878	51.2432
LIFPGSAEDVERL	10	3	2	F5B8W3;F5B8W1		1445.77	High	60.08	0.00111571	High	74.31	4.22873e-05	High	71.26	8.8284e-05	0	2	723.386	50.7686	2	723.386	51.1861	2	723.385	50.9576
TFPGSIEDVERL	59	2	1	B8Q5G0		1362.69	High	86.51	2.47335e-06	High	86.63	2.78464e-06	High	82.04	7.57397e-06	0	2	681.849	51.6521	2	681.85	51.4089	2	681.849	48.6801
AFNVDEEIINRLQ	8	1	1	F5B8V7		1560.8	High	77.51	2.33616e-05	High	50.45	0.0110397	High	67.63	0.000220476	0	2	780.905	52.7998	2	780.905	52.2263	2	780.906	52.6123
SRDEDLFLPGPDSY	1	1	1	A0A4P1RIP9		1610.73				High	44.69	0.025871				0				2	805.87	52.3486
TFPGSTEDVERLI	6	1	1	F5B8W2		1463.73	High	78.57	1.72535e-05	High	78.26	1.81054e-05	High	74.57	4.34243e-05	0	2	732.371	52.9742	2	732.372	52.8973	2	732.372	53.2161
LTFTEINEGALLLPHYNSK	1	5	2	B0YJF7;B8Q5G0		2160.14				High	53.92	0.00566495				0				3	720.717	53.8175
FNVDEEIINRL	11	1	1	F5B8V7		1361.71	High	73.84	5.24467e-05	High	73.78	5.31763e-05	High	73.79	4.91285e-05	0	2	681.358	54.1408	2	681.358	54.1346	2	681.356	53.8831
DYHDVFMPY	2	1	1	A0A4P1RE09		1186.49	High	45.29	0.00746454	High	49.3	0.00296485				0	2	593.748	54.3196	2	593.748	54.7298
DFLVDHIDFSDETDTK	7	1	1	A0A4P1QWQ4		1896.85	High	47.4	0.0121947	High	68.39	9.74082e-05	High	50.78	0.00537794	0	3	632.955	55.4539	3	632.955	55.0315	2	948.927	55.5429
AYNDEDLIRIL	16	1	1	A0A1J7HUX7		1334.7	High	55.53	0.00322191	High	55.53	0.00305607	High	55.14	0.00331259	0	2	667.854	56.582	2	667.855	55.1319	2	667.855	56.3367
AFNVDEEIINRL	71	1	1	F5B8V7		1432.74	High	73.31	5.73548e-05	High	73.34	5.70179e-05	High	73.31	5.45735e-05	0	2	716.876	55.9464	2	716.876	55.1945	2	716.876	54.5623
TFPGSIEDVERLIK	36	2	1	B8Q5G0		1603.87	High	64.64	0.000371266	High	56.27	0.00253421	High	63.66	0.000465378	0	2	802.438	54.6525	2	802.438	55.2489	2	802.438	56.5344
PGSIEDVERLIK	1	2	1	B8Q5G0		1355.75				High	46.05	0.0162074				0				2	678.38	55.2519
YEGGIKLPLDVIST	2	1	1	A0A4P1RE09		1504.83	High	63.76	0.000358501	High	60.08	0.000861582				0	2	752.918	58.3197	2	752.918	57.5973
DLAATSPVKQVFRGIPAEVL	4	1	1	F5B8V7		2111.19				High	51.1	0.00475684	High	48.46	0.00897064	0				2	1056.1	58.2752	2	1056.1	58.7715
FVMDSPDDVWRIS	9	2	1	A0A4P1RSN4		1566.73	High	62.93	0.000426412	High	69.52	0.000102846	High	61.88	0.000539437	0	2	783.864	58.6254	2	783.867	58.6514	2	783.865	59.0847
IDTTNLDNQLDQIPRRFYLS	6	1	1	F5B8V6		2422.24	High	60.93	0.0012827	High	69.87	0.000164584	High	57.08	0.00317117	0	3	808.084	58.3857	3	808.083	58.7531	3	808.084	58.6513
TFPGSIEDVERLIKNQ	6	2	1	B8Q5G0		1845.98	High	66.11	0.000298467	High	49.83	0.0125648	High	48	0.0190647	0	2	923.492	59.206	2	923.493	59.061	2	923.493	59.2131
LIFPGSAEDVERLIRNQ	2	2	1	F5B8W3		1957.05	High	47.3	0.020874	High	44.95	0.0343977				0	3	653.022	59.3762	3	653.022	59.1211
REGDIIAIPPGIPY	17	1	1	F5B8V7		1510.83	High	53.9	0.00317797	High	53.88	0.00297041	High	52.51	0.00437674	0	2	755.917	60.5399	2	755.918	59.241	2	755.917	59.7415
IFPGSAEDVERLI	5	3	2	F5B8W3;F5B8W1		1445.76	High	64.39	0.000397777	High	54.48	0.00395429	High	53.66	0.00476528	0	2	723.385	55.2577	2	723.392	59.9252	2	723.391	59.919
PGLTIGDTIPNLE	2	1	1	A0A4P1R4M4		1339.71				High	58.05	0.00127071	High	49.25	0.0093957	0				2	670.359	60.3324	2	670.359	60.4067
WLPPWLDAH	3	1	1	A0A4P1QYJ0		1134.58				High	48.73	0.0159549	High	49.1	0.0142434	0				2	567.79	60.3663	2	567.791	59.7816
IDTTNLDNQLDQIPRRFYL	6	1	1	F5B8V6		2335.2	High	52.55	0.00844196	High	48.82	0.0201698	High	54.35	0.00565229	0	3	779.074	59.6634	3	779.074	60.466	3	779.073	59.8033
LIDTTNLDNQLDQIPRRFYLS	5	1	1	F5B8V6		2535.32	High	49.84	0.0161875	High	62.28	0.00091695	High	49.5	0.0177548	0	3	845.778	61.3159	3	845.78	61.4265	3	845.778	61.1423
LTFPGSIEDVERLIK	6	2	1	B8Q5G0		1716.96	High	46.15	0.0204879	High	51.46	0.00583351	High	42.39	0.048434	0	3	572.988	62.7997	3	572.99	62.4095	3	572.99	62.0868
TFPGSVEDVERLI	18	3	1	A0A1J7G5F6		1461.76	High	79.57	1.2937e-05	High	79.55	1.34587e-05	High	80.29	1.14293e-05	0	2	731.383	64.3425	2	731.383	63.2644	2	731.384	63.4857
IDLGSSFPRLF	3	1	1	A0A4P1R809		1251.67	High	57.68	0.00132034	High	61.56	0.000590425				0	2	626.341	65.665	2	626.34	65.473
TFPGSIEDVERLI	22	2	1	B8Q5G0		1475.77	High	66.44	0.000274166	High	63.52	0.000538693	High	67.01	0.00023698	0	2	738.385	69.8774	2	738.391	69.6169	2	738.39	68.7345
