# Supplementary material for: A Lupinus angustifolius protein hydrolysate exerts hypocholesterolemic effects in Western diet-fed ApoE−/− mice through the modulation of LDLR and PCSK9 pathways
Source: Royal Society of Chemistry journal article supplement (doi:10.1039/d1fo03847h), 2022-01-01
Supplement: d1fo03847h3.xlsx [file d1fo03847h3.xlsx]

## Sheet: Compounds
Name (3 Letter Code)	Name (1 Letter Code)	RT [min]	Formula	Molecular Weight	Mean Area	Name (J=L)	Name (J=I)
Xle-Arg	JR	5.225	C12H25N5O3	287.195	4.31039e+09	LR	IR
Ala-Phe	AF	6.464	C12H16N2O3	236.115	3.72707e+09	AF	AF
Val-Xle	VJ	7.122	C11H22N2O3	230.162	3.60841e+09	VL	VI
Gly-Phe	GF	6.246	C11H14N2O3	222.1	3.18806e+09	GF	GF
Phe-Xle	FJ	11.279	C15H22N2O3	278.162	3.06551e+09	FL	FI
Xle-Xle	JJ	9.741	C12H24N2O3	244.178	2.5589e+09	LL	II
Phe-Xle-Ala-Phe	FJAF	16.403	C27H36N4O5	496.267	2.61453e+09	FLAF	FIAF
Phe-His	FH	5.847	C15H18N4O3	302.137	2.28535e+09	FH	FH
Val-Xle-Pro-Ala	VJPA	8.058	C19H34N4O5	398.252	2.16455e+09	VLPA	VIPA
Gln-Xle	QJ	4.782	C11H21N3O4	259.152	2.08665e+09	QL	QI
Xle-Xle-Arg	JJR	10.827	C18H36N6O4	400.279	1.93125e+09	LLR	IIR
Phe-Arg	FR	6.608	C15H23N5O3	321.179	1.96058e+09	FR	FR
Phe-Lys	FK	5.943	C15H23N3O3	293.173	1.83427e+09	FK	FK
Asn-Xle-Arg	NJR	4.474	C16H31N7O5	401.237	1.8761e+09	NLR	NIR
Xle-Tyr	JY	6.921	C15H22N2O4	294.157	1.65629e+09	LY	IY
Xle-Xle	JJ	9.1	C12H24N2O3	244.178	1.62095e+09	LL	II
Val-Phe	VF	8.645	C14H20N2O3	264.146	1.60607e+09	VF	VF
Val-Val-Pro-Gln	VVPQ	5.862	C20H35N5O6	441.257	1.42304e+09	VVPQ	VVPQ
Ser-Tyr	SY	3.279	C12H16N2O5	268.105	1.35058e+09	SY	SY
Gly-Glu-Xle-Glu	GEJE	5.918	C18H30N4O9	446.2	1.26093e+09	GELE	GEIE
Phe-Xle-Thr-Gln	FJTQ	9.51	C24H37N5O7	507.268	1.29298e+09	FLTQ	FITQ
Ala-Xle-Pro-Xle	AJPJ	13.19	C20H36N4O5	412.267	1.24862e+09	ALPL	AIPI
Xle-Ala-Phe	JAF	12.283	C18H27N3O4	349.199	1.18608e+09	LAF	IAF
Gly-Val-Pro-Phe	GVPF	12.497	C21H30N4O5	418.22	1.10886e+09	GVPF	GVPF
Gly-His-Pro-Xle	GHPJ	7.294	C19H30N6O5	422.226	1.093e+09	GHPL	GHPI
Phe-Ala-Asn	FAN	4.304	C16H22N4O5	350.158	1.07161e+09	FAN	FAN
Phe-Ser-Gly-Phe	FSGF	12.567	C23H28N4O6	456.2	1.03679e+09	FSGF	FSGF
Xle-Gly-Arg	JGR	4.28	C14H28N6O4	344.216	1.03714e+09	LGR	IGR
Xle-Phe	JF	10.663	C15H22N2O3	278.162	9.82653e+08	LF	IF
Xle-Xle-Pro-Ala	JJPA	9.215	C20H36N4O5	412.267	9.79644e+08	LLPA	IIPA
Ala-Xle	AJ	4.785	C9H18N2O3	202.131	9.82543e+08	AL	AI
Xle-Val	JV	6.613	C11H22N2O3	230.162	9.40885e+08	LV	IV
Xle-Arg	JR	3.165	C12H25N5O3	287.195	9.05792e+08	LR	IR
Glu-Tyr	EY	4.564	C14H18N2O6	310.115	8.85655e+08	EY	EY
Ser-Xle	SJ	4.393	C9H18N2O4	218.126	8.72787e+08	SL	SI
Tyr-Arg	YR	4.085	C15H23N5O4	337.174	8.19816e+08	YR	YR
Val-Val-Xle	VVJ	10.543	C16H31N3O4	329.23	8.69107e+08	VVL	VVI
Glu-Asn-Xle	ENJ	6.236	C15H26N4O7	374.179	8.404e+08	ENL	ENI
Trp-Thr-Tyr	WTY	11.531	C24H28N4O6	468.2	8.72118e+08	WTY	WTY
Lys-Xle	KJ	4.436	C12H25N3O3	259.189	8.60727e+08	KL	KI
Thr-Phe	TF	6.708	C13H18N2O4	266.126	8.31747e+08	TF	TF
Gly-Xle-Asn	GJN	2.428	C12H22N4O5	302.158	7.99764e+08	GLN	GIN
Xle-Ala-Phe	JAF	12.568	C18H27N3O4	349.199	8.4676e+08	LAF	IAF
Xle-Xle-Phe	JJF	15.548	C21H33N3O4	391.246	8.32245e+08	LLF	IIF
Tyr-Phe	YF	9.756	C18H20N2O4	328.141	8.22504e+08	YF	YF
Phe-Val-Pro-Thr	FVPT	12.349	C28H36N4O6	524.262	8.10026e+08	FVPT	FVPT
Arg-Xle-Val	RJV	8.008	C17H34N6O4	386.263	8.15066e+08	RLV	RIV
Gly-Xle	GJ	4.977	C8H16N2O3	188.115	8.07934e+08	GL	GI
Xle-Gln	JQ	2.001	C11H21N3O4	259.152	7.42596e+08	LQ	IQ
Val-Gly-Ala-Phe	VGAF	11.179	C19H28N4O5	392.205	7.71995e+08	VGAF	VGAF
Val-Arg	VR	1.406	C11H23N5O3	273.179	6.31537e+08	VR	VR
Val-Ala-Phe	VAF	10.437	C17H25N3O4	335.183	7.5875e+08	VAF	VAF
Xle-Xle-Pro-His	JJPH	9.351	C23H38N6O5	478.289	7.53872e+08	LLPH	IIPH
Xle-Phe	JF	11.462	C15H22N2O3	278.162	7.0635e+08	LF	IF
Lys-Tyr	KY	3.346	C15H23N3O4	309.168	7.04267e+08	KY	KY
Phe-Glu-Asn-Xle	FENJ	11.028	C24H35N5O8	521.247	7.02638e+08	FENL	FENI
Gly-Asn-Phe-Tyr	GNFY	9.919	C24H29N5O7	499.205	6.87032e+08	GNFY	GNFY
Glu-Xle	EJ	5.208	C11H20N2O5	260.136	6.5812e+08	EL	EI
Thr-Tyr	TY	3.9	C13H18N2O5	282.121	6.51067e+08	TY	TY
Ser-Val-Xle-Phe	SVJF	14.144	C23H36N4O6	464.262	6.56716e+08	SVLF	SVIF
Xle-Thr-Xle	JTJ	11.583	C16H31N3O5	345.225	6.59419e+08	LTL	ITI
Val-Ser-Pro-Gln	VSPQ	3.676	C18H31N5O7	429.221	5.88036e+08	VSPQ	VSPQ
Glu-Gly-Gln-Xle	EGQJ	7.269	C18H31N5O8	445.216	6.36667e+08	EGQL	EGQI
Xle-Phe-Glu-Glu	JFEE	10.085	C25H36N4O9	536.247	6.02864e+08	LFEE	IFEE
Xle-Gln-Xle	JQJ	11.218	C17H32N4O5	372.236	5.99611e+08	LQL	IQI
Trp-Asn-Xle-Asn	WNJN	11.048	C25H35N7O7	545.258	6.06418e+08	WNLN	WNIN
Phe-Ser-Ser-Arg	FSSR	4.893	C21H33N7O7	495.243	6.00005e+08	FSSR	FSSR
Tyr-Xle-Ala	YJA	7.336	C18H27N3O5	365.194	5.54736e+08	YLA	YIA
Xle-Thr-Phe	JTF	12.738	C19H29N3O5	379.21	5.57068e+08	LTF	ITF
Phe-Gln	FQ	4.115	C14H19N3O4	293.137	5.52561e+08	FQ	FQ
Xle-Phe-Glu	JFE	9.236	C20H29N3O6	407.204	5.3968e+08	LFE	IFE
Xle-Lys	JK	1.929	C12H25N3O3	259.188	5.10171e+08	LK	IK
Tyr-Xle-Ala	YJA	7.827	C18H27N3O5	365.194	4.89623e+08	YLA	YIA
Glu-Val-Xle	EVJ	8.858	C16H29N3O6	359.205	5.1209e+08	EVL	EVI
Xle-Arg-Gly	JRG	6.716	C14H28N6O4	344.216	5.08568e+08	LRG	IRG
Xle-Arg-Xle-Xle	JRJJ	14.159	C24H47N7O5	513.363	5.07553e+08	LRLL	IRII
Gln-Asn-Tyr	QNY	4.777	C18H25N5O7	423.174	4.95388e+08	QNY	QNY
Arg-Xle-Asn	RJN	3.179	C16H31N7O5	401.237	4.94159e+08	RLN	RIN
Asn-Phe	NF	6.112	C13H17N3O4	279.121	4.98737e+08	NF	NF
Gln-Arg-Thr-Val	QRTV	4.96	C20H38N8O7	502.285	4.8607e+08	QRTV	QRTV
Asn-Tyr	NY	3.449	C13H17N3O5	295.116	4.76472e+08	NY	NY
Tyr-Ser-Asn-Lys	YSNK	1.735	C22H34N6O8	510.242	4.63227e+08	YSNK	YSNK
Phe-Ser	FS	6.028	C12H16N2O4	252.11	4.5409e+08	FS	FS
Ala-Tyr	AY	3.484	C12H16N2O4	252.11	4.30179e+08	AY	AY
Ala-Gln-Pro-Gln	AQPQ	1.503	C18H30N6O7	442.216	4.49213e+08	AQPQ	AQPQ
Ala-Pro-Gln-Glu	APQE	2.77	C18H29N5O8	443.2	4.3903e+08	APQE	APQE
Xle-Arg-Xle-Xle	JRJJ	13.751	C24H47N7O5	513.363	4.48638e+08	LRLL	IRII
Xle-Arg-Xle	JRJ	10.196	C18H36N6O4	400.279	4.40051e+08	LRL	IRI
Xle-Val-Gln	JVQ	4.793	C16H30N4O5	358.22	4.17215e+08	LVQ	IVQ
Val-Val	VV	3.843	C10H20N2O3	216.147	4.19508e+08	VV	VV
Phe-Ser-Gln-Arg	FSQR	6.181	C23H36N8O7	536.269	4.19695e+08	FSQR	FSQR
Xle-Arg-Glu	JRE	5.265	C17H32N6O6	416.237	4.17242e+08	LRE	IRE
Phe-Xle-Ser-Gln	FJSQ	8.839	C23H35N5O7	493.252	4.14242e+08	FLSQ	FISQ
Ser-Gly-Pro-Phe	SGPF	9.601	C19H26N4O6	406.184	4.10996e+08	SGPF	SGPF
Phe-Asn	FN	3.049	C13H17N3O4	279.121	4.12588e+08	FN	FN
Xle-Ser-Arg	JSR	4.205	C15H30N6O5	374.227	4.03225e+08	LSR	ISR
Tyr-Xle-Ser	YJS	6.683	C18H27N3O6	381.189	4.01616e+08	YLS	YIS
Xle-Arg	JR	2.934	C12H25N5O3	287.195	4.02694e+08	LR	IR
Tyr-Xle	YJ	8.466	C15H22N2O4	294.157	3.96683e+08	YL	YI
Xle-Gly-Glu-Glu	JGEE	6.3	C18H30N4O9	446.2	3.71569e+08	LGEE	IGEE
Xle-Tyr	JY	7.359	C15H22N2O4	294.157	3.92436e+08	LY	IY
Val-Xle-Glu	VJE	5.934	C16H29N3O6	359.204	3.8049e+08	VLE	VIE
Xle-Ser-Pro-Gln	JSPQ	4.037	C19H33N5O7	443.237	3.78906e+08	LSPQ	ISPQ
Ala-Asn-Pro-Xle	ANPJ	8.258	C18H31N5O6	413.226	3.85939e+08	ANPL	ANPI
Xle-Ser-Xle	JSJ	11.043	C15H29N3O5	331.21	3.8123e+08	LSL	ISI
Ala-Val-Arg	AVR	3.002	C14H28N6O4	344.216	3.6061e+08	AVR	AVR
Arg-Tyr-Glu	RYE	4.358	C20H30N6O7	466.216	3.58598e+08	RYE	RYE
Gln-Gln	QQ	0.717	C10H18N4O5	274.127	2.66917e+08	QQ	QQ
Tyr-Val-Xle	YVJ	11.764	C20H31N3O5	393.225	3.50589e+08	YVL	YVI
Xle-Ala	JA	2.837	C9H18N2O3	202.131	3.20508e+08	LA	IA
Xle-Ser-Xle	JSJ	11.604	C15H29N3O5	331.21	3.33192e+08	LSL	ISI
Xle-Val	JV	5.903	C11H22N2O3	230.162	3.24027e+08	LV	IV
Xle-Xle-Pro-Lys	JJPK	8.373	C23H43N5O5	469.325	3.24601e+08	LLPK	IIPK
Tyr-Glu-Glu	YEE	4.637	C19H25N3O9	439.158	3.25616e+08	YEE	YEE
Thr-Xle-Glu	TJE	5.075	C15H27N3O7	361.184	3.12088e+08	TLE	TIE
Xle-Tyr-Glu	JYE	6.959	C20H29N3O7	423.199	3.15053e+08	LYE	IYE
Ser-Asn-Xle	SNJ	4.971	C13H24N4O6	332.168	3.07507e+08	SNL	SNI
His-Xle	HJ	4.387	C12H20N4O3	268.153	3.08222e+08	HL	HI
Gln-Glu-Arg-Glu	QERE	1.58	C21H36N8O10	560.254	3.05504e+08	QERE	QERE
Arg-Gln	RQ	0.801	C11H22N6O4	302.169	2.88069e+08	RQ	RQ
Phe-Phe	FF	12.351	C18H20N2O3	312.146	2.88009e+08	FF	FF
Arg-Glu-Glu	REE	1.244	C16H28N6O8	432.196	2.92272e+08	REE	REE
Arg-Val-Xle	RVJ	8.468	C17H34N6O4	386.263	2.91049e+08	RVL	RVI
Xle-Thr	JT	2.003	C10H20N2O4	232.142	2.74168e+08	LT	IT
Ser-Val-Phe	SVF	10.395	C17H25N3O5	351.178	2.7112e+08	SVF	SVF
Ser-Gly-Phe	SGF	6.875	C14H19N3O5	309.132	2.86482e+08	SGF	SGF
Gln-Tyr	QY	3.796	C14H19N3O5	309.131	2.81472e+08	QY	QY
Tyr-Asn-Val-Asn	YNVN	6.157	C22H32N6O8	508.227	2.74e+08	YNVN	YNVN
Val-Gly-Ala-Xle	VGAJ	10.18	C16H30N4O5	358.221	2.73492e+08	VGAL	VGAI
Tyr-Ser-Phe	YSF	11.121	C21H25N3O6	415.173	2.77611e+08	YSF	YSF
Lys-Glu-Val-Xle	KEVJ	8.133	C22H41N5O7	487.299	2.76295e+08	KEVL	KEVI
Xle-Xle-Arg	JJR	7.179	C18H36N6O4	400.279	2.65254e+08	LLR	IIR
Xle-Ala-Gly-Arg	JAGR	6.456	C17H33N7O5	415.253	2.58215e+08	LAGR	IAGR
Gln-Gly-Val-Xle	QGVJ	8.777	C18H33N5O6	415.242	2.66287e+08	QGVL	QGVI
Gly-Gln-Xle-Xle	GQJJ	11.155	C19H35N5O6	429.257	2.60504e+08	GQLL	GQII
Xle-Ala	JA	3.21	C9H18N2O3	202.131	2.56511e+08	LA	IA
Xle-Asn-Ser-Gln	JNSQ	2.109	C18H32N6O8	460.227	2.48723e+08	LNSQ	INSQ
Val-Val-Ala	VVA	4.582	C13H25N3O4	287.184	2.45753e+08	VVA	VVA
Met-Xle	MJ	8.434	C11H22N2O3S	262.134	2.56308e+08	ML	MI
Val-Val-Val	VVV	8.337	C15H29N3O4	315.215	2.51714e+08	VVV	VVV
Trp-Met-Tyr	WMY	13.401	C25H30N4O5S	498.193	2.47993e+08	WMY	WMY
Xle-Ala-Xle	JAJ	11.09	C15H29N3O4	315.215	2.46445e+08	LAL	IAI
Xle-Xle-Asn	JJN	5.753	C16H30N4O5	358.221	2.3874e+08	LLN	IIN
Arg-Val-Xle-Xle	RVJJ	12.72	C23H45N7O5	499.347	2.36972e+08	RVLL	RVII
Gln-Xle-Gln	QJQ	3.385	C16H29N5O6	387.21	2.41553e+08	QLQ	QIQ
His-Asn-Pro-Xle	HNPJ	8.078	C21H33N7O6	479.248	2.36507e+08	HNPL	HNPI
Xle-Thr-Pro-Gln	JTPQ	6.646	C20H35N5O7	457.252	2.40804e+08	LTPQ	ITPQ
Val-Tyr	VY	5.316	C14H20N2O4	280.141	2.37917e+08	VY	VY
Asn-Val-Asn-Xle	NVNJ	8.746	C19H34N6O7	458.248	2.34555e+08	NVNL	NVNI
Gln-Thr-Xle	QTJ	6.415	C15H28N4O6	360.2	2.27623e+08	QTL	QTI
Gly-Tyr	GY	3.579	C11H14N2O4	238.095	2.24101e+08	GY	GY
Xle-Asn-Xle	JNJ	11.059	C16H30N4O5	358.22	2.25515e+08	LNL	INI
Arg-Xle-Gln	RJQ	3.983	C17H33N7O5	415.253	2.26299e+08	RLQ	RIQ
Arg-Val-Ser	RVS	1.623	C14H28N6O5	360.211	2.07108e+08	RVS	RVS
Val-Thr-Arg	VTR	2.156	C15H30N6O5	374.227	1.95491e+08	VTR	VTR
Xle-Thr-Gln-Glu	JTQE	5.756	C20H35N5O9	489.242	2.20577e+08	LTQE	ITQE
Asp-Xle	DJ	4.694	C10H18N2O5	246.121	2.11985e+08	DL	DI
Ser-Xle-Xle-Tyr	SJJY	12.396	C24H38N4O7	494.273	2.14421e+08	SLLY	SIIY
Phe-Tyr	FY	8.735	C18H20N2O4	328.141	2.13654e+08	FY	FY
Xle-Tyr-Xle-Gln	JYJQ	10.204	C26H41N5O7	535.299	2.08508e+08	LYLQ	IYIQ
Tyr-Gln-Asp-Xle	YQDJ	9.685	C24H35N5O9	537.242	2.12035e+08	YQDL	YQDI
Phe-Glu	FE	5.065	C14H18N2O5	294.121	2.08265e+08	FE	FE
Gly-Ala-Xle	GAJ	5.812	C11H21N3O4	259.152	2.04935e+08	GAL	GAI
Val-Ala-Xle	VAJ	9.249	C14H27N3O4	301.199	1.96598e+08	VAL	VAI
Xle-Asn-Thr-Arg	JNTR	6.776	C20H38N8O7	502.285	1.99308e+08	LNTR	INTR
Val-Ala-Xle-Asn	VAJN	6.969	C18H33N5O6	415.242	2.02996e+08	VALN	VAIN
Glu-Arg	ER	0.892	C11H21N5O5	303.153	2.00617e+08	ER	ER
Xle-Asn-Glu	JNE	4.321	C15H26N4O7	374.179	1.91353e+08	LNE	INE
Val-Gly-Xle-Arg	VGJR	7.52	C19H37N7O5	443.284	1.78297e+08	VGLR	VGIR
Lys-Asp-Ser-Xle	KDSJ	6.195	C19H35N5O8	461.247	1.89183e+08	KDSL	KDSI
Ala-Arg	AR	0.835	C9H19N5O3	245.148	1.71167e+08	AR	AR
Xle-Glu	JE	2.758	C11H20N2O5	260.136	1.78138e+08	LE	IE
Glu-Ala-Thr	EAT	0.985	C12H21N3O7	319.137	1.81619e+08	EAT	EAT
Lys-Xle-Arg-Xle	KJRJ	8.468	C24H48N8O5	528.373	1.87783e+08	KLRL	KIRI
Ser-Xle-Asn	SJN	2.605	C13H24N4O6	332.169	1.82099e+08	SLN	SIN
Ser-Xle-Phe	SJF	13.165	C18H27N3O5	365.194	1.89339e+08	SLF	SIF
Xle-Gln	JQ	3.285	C11H21N3O4	259.152	1.76395e+08	LQ	IQ
Thr-Ala-Phe-Asn	TAFN	6.105	C20H29N5O7	451.205	1.84128e+08	TAFN	TAFN
Val-Xle-Xle	VJJ	12.471	C17H33N3O4	343.246	1.77895e+08	VLL	VII
Lys-Thr-Xle	KTJ	5.617	C16H32N4O5	360.236	1.8419e+08	KTL	KTI
Arg-Trp-Xle	RWJ	13	C23H35N7O4	473.274	1.78444e+08	RWL	RWI
Xle-Glu	JE	3.099	C11H20N2O5	260.136	1.76029e+08	LE	IE
Ser-Xle-Xle-Xle	SJJJ	14.886	C21H40N4O6	444.294	1.71443e+08	SLLL	SIII
Xle-Arg	JR	4.271	C12H25N5O3	287.195	1.62985e+08	LR	IR
Phe-Val-Val-Ala	FVVA	11.379	C22H34N4O5	434.251	1.54141e+08	FVVA	FVVA
Arg-Glu-Phe	REF	7.82	C20H30N6O6	450.221	1.72071e+08	REF	REF
Phe-Val-Phe-Xle	FVFJ	18.861	C29H40N4O5	524.298	1.73713e+08	FVFL	FVFI
Ala-Phe	AF	9.539	C12H16N2O3	236.115	1.64234e+08	AF	AF
Val-Xle-Arg	VJR	5.403	C17H34N6O4	386.263	1.70555e+08	VLR	VIR
Thr-Ser-Xle	TSJ	6.543	C13H25N3O6	319.173	1.63385e+08	TSL	TSI
Glu-Asp-Arg	EDR	1.041	C15H26N6O8	418.18	1.66126e+08	EDR	EDR
Xle-Asn	JN	1.396	C10H19N3O4	245.137	1.65386e+08	LN	IN
Ser-Thr-Phe	STF	7.308	C16H23N3O6	353.157	1.5849e+08	STF	STF
Asn-Thr-Xle	NTJ	5.747	C14H26N4O6	346.184	1.60997e+08	NTL	NTI
Gln-Val	QV	1.935	C10H19N3O4	245.137	1.48693e+08	QV	QV
Phe-Xle-Gln	FJQ	8.862	C20H30N4O5	406.22	1.54125e+08	FLQ	FIQ
Val-Xle-Ala-Xle	VJAJ	12.868	C20H38N4O5	414.283	1.61668e+08	VLAL	VIAI
Gly-Asp-Val-Phe	GDVF	10.476	C20H28N4O7	436.195	1.59952e+08	GDVF	GDVF
Xle-Asp-Thr-Thr	JDTT	4.883	C18H32N4O9	448.216	1.55123e+08	LDTT	IDTT
Xle-Asp-Asp-Xle	JDDJ	11.423	C19H34N4O7	430.242	1.60301e+08	LDDL	IDDI
Arg-Val-Phe	RVF	9.614	C20H32N6O4	420.247	1.59567e+08	RVF	RVF
Gly-Val-Ala	GVA	2.349	C10H19N3O4	245.137	1.5675e+08	GVA	GVA
Val-Xle-Glu	VJE	6.304	C16H29N3O6	359.204	1.50698e+08	VLE	VIE
Asn-Xle-Glu	NJE	4.867	C15H26N4O7	374.179	1.49495e+08	NLE	NIE
Xle-Arg-Xle	JRJ	9.807	C18H36N6O4	400.279	1.54248e+08	LRL	IRI
Val-Xle-Phe	VJF	13.393	C20H31N3O4	377.23	1.54602e+08	VLF	VIF
Val-Asn-Xle	VNJ	9.244	C15H28N4O5	344.205	1.46827e+08	VNL	VNI
Asn-Xle-Xle	NJJ	11.507	C16H30N4O5	358.22	1.50531e+08	NLL	NII
Asp-Gly-Glu-Xle	DGEJ	6.824	C19H31N5O10	489.206	1.52702e+08	DGEL	DGEI
Xle-Gly-Gln-Arg	JGQR	7.118	C19H36N8O6	472.275	1.49005e+08	LGQR	IGQR
Val-Ser-Xle-Tyr	VSJY	10.553	C23H36N4O7	480.257	1.49842e+08	VSLY	VSIY
Xle-Asn-Asn-Xle	JNNJ	9.633	C20H36N6O7	472.263	1.45216e+08	LNNL	INNI
Glu-Gly-Ala-Xle	EGAJ	6.784	C16H28N4O7	388.195	1.49351e+08	EGAL	EGAI
Asn-Xle-Gln	NJQ	3.765	C15H27N5O6	373.195	1.43644e+08	NLQ	NIQ
Asn-Xle-Phe	NJF	12.457	C19H28N4O5	392.205	1.47508e+08	NLF	NIF
Ser-Xle-Tyr	SJY	8.643	C18H27N3O6	381.189	1.44467e+08	SLY	SIY
Xle-Thr	JT	2.31	C10H20N2O4	232.142	1.39136e+08	LT	IT
Xle-His	JH	1.879	C12H20N4O3	268.153	1.44949e+08	LH	IH
Phe-Gln-Xle	FQJ	13.432	C20H30N4O5	406.22	1.39908e+08	FQL	FQI
Arg-Phe-Gln	RFQ	5.7	C20H31N7O5	449.237	1.40343e+08	RFQ	RFQ
Glu-Gln	EQ	0.788	C10H17N3O6	275.111	1.20541e+08	EQ	EQ
Glu-Val-Lys	EVK	1.505	C16H30N4O6	374.215	1.3597e+08	EVK	EVK
Arg-Ala-Xle	RAJ	6.427	C15H30N6O4	358.232	1.41881e+08	RAL	RAI
Asp-Gly-Phe-Xle	DGFJ	12.418	C21H30N4O7	450.21	1.38834e+08	DGFL	DGFI
Val-Gly-Xle-Val	VGJV	10.965	C18H34N4O5	386.252	1.39809e+08	VGLV	VGIV
Asp-Xle-Phe	DJF	13.024	C19H27N3O6	393.189	1.38425e+08	DLF	DIF
Gly-Phe-Glu	GFE	6.39	C16H21N3O6	351.142	1.32041e+08	GFE	GFE
Gln-Phe	QF	6.409	C14H19N3O4	293.137	1.39545e+08	QF	QF
Phe-Xle-Gln-Tyr	FJQY	12.746	C29H39N5O7	569.283	1.35093e+08	FLQY	FIQY
Gln-Gln-Xle-Tyr	QQJY	8.759	C25H38N6O8	550.274	1.23265e+08	QQLY	QQIY
Glu-Phe	EF	7.471	C14H18N2O5	294.121	1.31952e+08	EF	EF
Xle-Glu-Asn-Glu	JENE	5.155	C20H33N5O10	503.221	1.30435e+08	LENE	IENE
Ala-Thr-Phe	ATF	7.995	C16H23N3O5	337.163	1.32637e+08	ATF	ATF
Xle-Ala-Ser-Arg	JASR	7.157	C18H35N7O6	445.264	1.2879e+08	LASR	IASR
Xle-Pro-His	JPH	9.352	C17H27N5O4	365.205	1.28869e+08	LPH	IPH
Arg-Xle-Pro-Ala	RJPA	7.932	C20H37N7O5	455.284	1.28525e+08	RLPA	RIPA
Val-Glu-Glu	VEE	2.993	C15H25N3O8	375.163	1.30198e+08	VEE	VEE
Val-Lys	VK	1.031	C11H23N3O3	245.173	1.12807e+08	VK	VK
Gln-Val-Ser	QVS	1.345	C13H24N4O6	332.169	1.18434e+08	QVS	QVS
Tyr-Val-Asn-Xle	YVNJ	11.365	C24H37N5O7	507.268	1.17974e+08	YVNL	YVNI
Ala-Thr-Gln-Phe	ATQF	8.205	C21H31N5O7	465.221	1.27379e+08	ATQF	ATQF
Gln-Thr-Tyr	QTY	5.23	C18H26N4O7	410.179	1.24817e+08	QTY	QTY
Xle-Arg-Xle-Xle	JRJJ	14.975	C24H47N7O5	513.363	1.2647e+08	LRLL	IRII
Ser-Asn-Xle-Arg	SNJR	4.652	C19H36N8O7	488.269	1.25679e+08	SNLR	SNIR
Arg-Xle-Ser	RJS	3.58	C15H30N6O5	374.227	1.23336e+08	RLS	RIS
Val-Val-Ala-His	VVAH	4.128	C19H32N6O5	424.242	1.27135e+08	VVAH	VVAH
Asn-Gln-Gln-Gln	NQQQ	0.802	C19H32N8O9	516.228	1.22986e+08	NQQQ	NQQQ
Gln-Xle-Tyr	QJY	8.432	C20H30N4O6	422.215	1.23707e+08	QLY	QIY
Glu-Phe-Gln	EFQ	5.587	C19H26N4O7	422.179	1.23889e+08	EFQ	EFQ
Ser-Val-Xle	SVJ	8.968	C14H27N3O5	317.194	1.22251e+08	SVL	SVI
Thr-Val-Xle	TVJ	8.97	C15H29N3O5	331.21	1.18537e+08	TVL	TVI
Gly-Xle-Arg	GJR	4.66	C14H28N6O4	344.216	1.15397e+08	GLR	GIR
Gly-Arg-Xle-Ser	GRJS	4.96	C17H33N7O6	431.248	1.15021e+08	GRLS	GRIS
Gly-Xle-Arg	GJR	10.692	C14H28N6O4	344.216	1.09634e+08	GLR	GIR
Phe-Thr-Glu	FTE	6.607	C18H25N3O7	395.168	1.12422e+08	FTE	FTE
Glu-Glu	EE	0.822	C10H16N2O7	276.095	1.10766e+08	EE	EE
Tyr-Lys-Arg	YKR	5.134	C21H35N7O5	465.269	1.0657e+08	YKR	YKR
Ala-Glu-Xle-Glu	AEJE	8.072	C19H32N4O9	460.215	1.10663e+08	AELE	AEIE
Glu-Thr-Trp	ETW	9.101	C20H26N4O7	434.179	1.12011e+08	ETW	ETW
Val-Asn-Thr-Glu	VNTE	4.414	C18H31N5O9	461.211	1.103e+08	VNTE	VNTE
Phe-Ala-Xle	FAJ	13.604	C18H27N3O4	349.199	1.11419e+08	FAL	FAI
Val-His	VH	1.028	C11H18N4O3	254.137	9.63547e+07	VH	VH
Val-Val-Asn	VVN	1.945	C14H26N4O5	330.189	1.00043e+08	VVN	VVN
Glu-Xle-Arg	EJR	4.393	C17H32N6O6	416.237	1.0683e+08	ELR	EIR
Val-Glu-Glu-Glu	VEEE	3.654	C20H32N4O11	504.205	1.07265e+08	VEEE	VEEE
Trp-Xle	WJ	12.859	C17H23N3O3	317.173	1.03277e+08	WL	WI
Xle-Val-Val	JVV	10.041	C16H31N3O4	329.231	1.06527e+08	LVV	IVV
Phe-Thr-Thr-Xle	FTTJ	11.528	C23H36N4O7	480.257	9.78048e+07	FTTL	FTTI
Pro-Phe	PF	12.498	C14H18N2O3	262.131	1.04626e+08	PF	PF
Xle-Arg	JR	7.176	C12H25N5O3	287.195	1.04514e+08	LR	IR
Pro-Ala	PA	8.057	C8H14N2O3	186.1	1.00314e+08	PA	PA
His-Lys-Arg	HKR	0.965	C18H33N9O4	439.264	1.00542e+08	HKR	HKR
Pro-His	PH	9.351	C11H16N4O3	252.121	1.03875e+08	PH	PH
Ser-Val-Asn	SVN	1.08	C12H22N4O6	318.153	1.01678e+08	SVN	SVN
Ser-Arg	SR	0.778	C9H19N5O4	261.143	9.9437e+07	SR	SR
Arg-Phe-Tyr	RFY	9.754	C24H32N6O5	484.242	9.82614e+07	RFY	RFY
Val-Ser-Glu-Xle	VSEJ	8.502	C19H34N4O8	446.236	1.00312e+08	VSEL	VSEI
Val-Arg-Arg-Tyr	VRRY	6.785	C26H44N10O6	592.343	1.01038e+08	VRRY	VRRY
Xle-Xle-Xle	JJJ	14.75	C18H35N3O4	357.262	9.98873e+07	LLL	III
Xle-Asn-Lys-Ala	JNKA	6.545	C19H36N6O6	444.268	9.96696e+07	LNKA	INKA
Thr-Phe-Asn	TFN	4.946	C17H24N4O6	380.168	9.97832e+07	TFN	TFN
Phe-Ala	FA	5.393	C12H16N2O3	236.115	9.83442e+07	FA	FA
